# Supplementary material for: Occurrence and stability of lone pair-π and OH–π interactions between water and nucleobases in functional RNAs
Source: PubMed Central journal article supplement — Nucleic Acids Res. 2020 May 11;48(11):5825–38. doi: 10.1093/nar/gkaa345 (PMC7293021; doi:10.1093/nar/gkaa345), 2020-05-11
Supplement: gkaa345_supplemental_file.pdf [file gkaa345_supplemental_file.pdf]

## **Occurrence and Stability of Lone Pair- $\pi$ and OH- $\pi$ Interactions between Water and Nucleobases in Functional RNAs**

Kanav Kalra<sup>1</sup>, Suresh Gorle<sup>2</sup>, Luigi Cavallo<sup>1,\*</sup>, Romina Oliva<sup>3,\*</sup>, Mohit Chawla<sup>1,\*</sup>

<sup>1</sup>King Abdullah University of Science and Technology (KAUST), Physical Sciences and Engineering Division, Kaust Catalysis Center, Thuwal 23955-6900, Saudi Arabia.

<sup>2</sup>Department of Biochemistry and Molecular Biology, University of Texas Medical Branch, Galveston, Texas 77555, USA. <sup>3</sup>Department of Sciences and Technologies, University

Parthenope of Naples, Centro Direzionale Isola C4, I-80143, Naples, Italy

Email: [mohit.chawla@kaust.edu.sa](mailto:mohit.chawla@kaust.edu.sa); [romina.oliva@uniparthenope.it](mailto:romina.oliva@uniparthenope.it);  
[luigi.cavallo@kaust.edu.sa](mailto:luigi.cavallo@kaust.edu.sa)

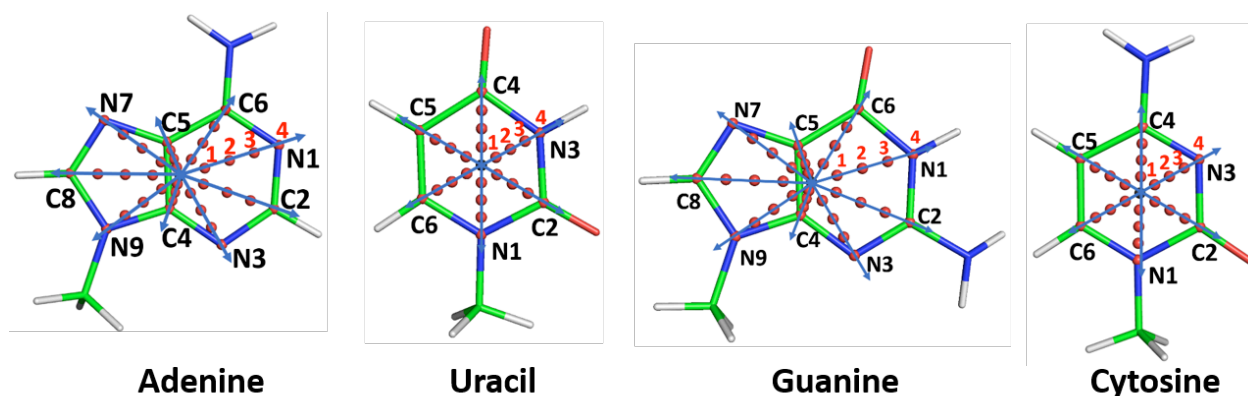

**Figure S1.** Grid positions for the calculation of the interaction energy for different projections of  $O^w$  on the nucleobase plane. Four steps along each of the lines connecting the nucleobase centroid to the ring atoms were considered. Atoms along each line were labeled as 1 to 4 (from the centroid towards the ring) preceded by the atom name. For instance, N1-1 represents the geometry with the  $O^w$  atom positioned above the first point connecting the ring centroid to the N1 atom. The distance between  $O^w$  and the nucleobase plane was set to the ideal values of 3.0 and 3.5 Å for the lp- $\pi$  and OH- $\pi$  geometries, respectively.

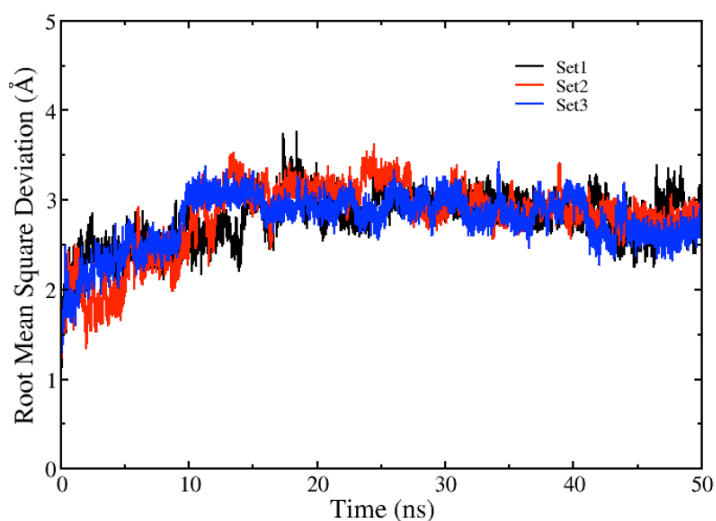

**Figure S2.** RMSD profile of the three sets of independent simulations we ran. In the main text, results corresponding to the Set 1 are reported.

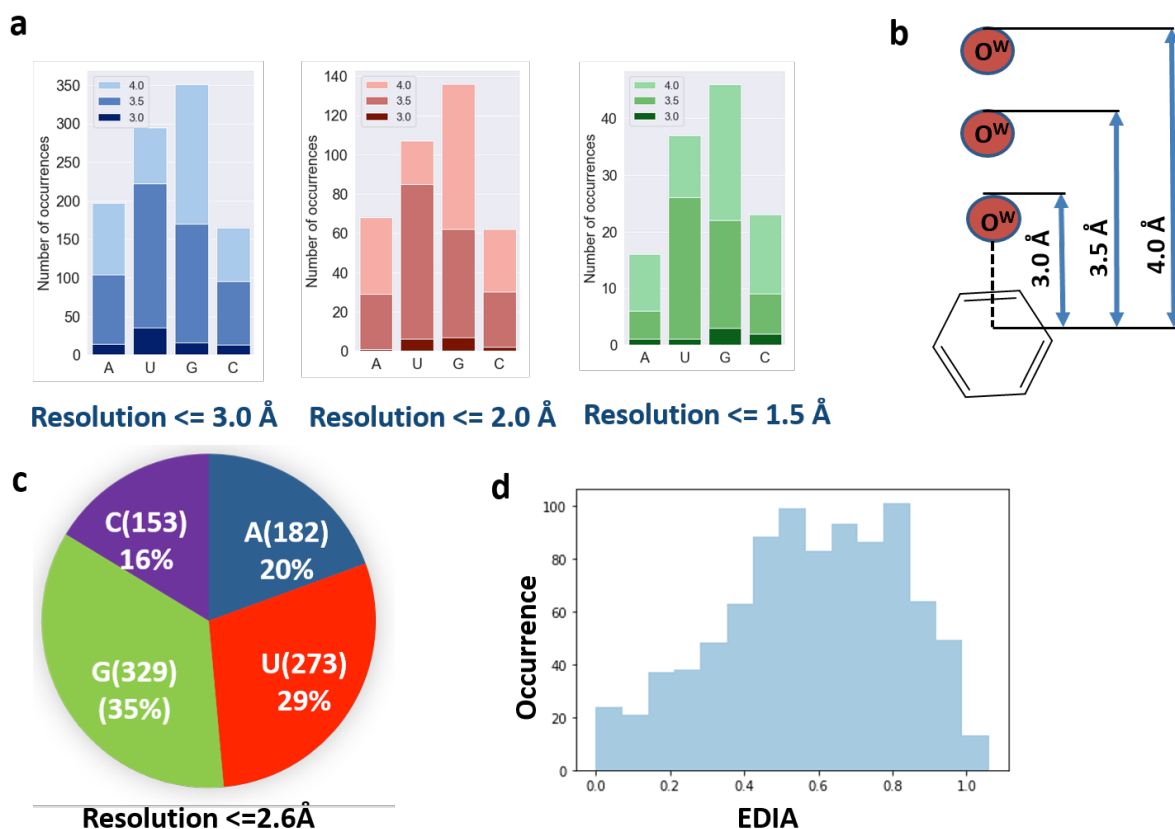

**Figure S3.** **a)** Distances distribution (within 3.0, 3.5 and 4.0 Å) of  $O^W$  from the nucleobase plane for the observed water-nucleobase stacking contacts in RNA structures at different resolution cutoffs. **b)** Scheme of the geometrical description of the distance cutoffs used in **a)**. **c)** Distribution of nucleobases involved in water-nucleobase stacking contacts with a resolution cutoff of  $\leq 2.6$  Å; **d)** Distribution of EDIA values for the  $O^W$  atoms of water molecules involved in water-nucleobase stacking contacts (see the Methods section in the text).

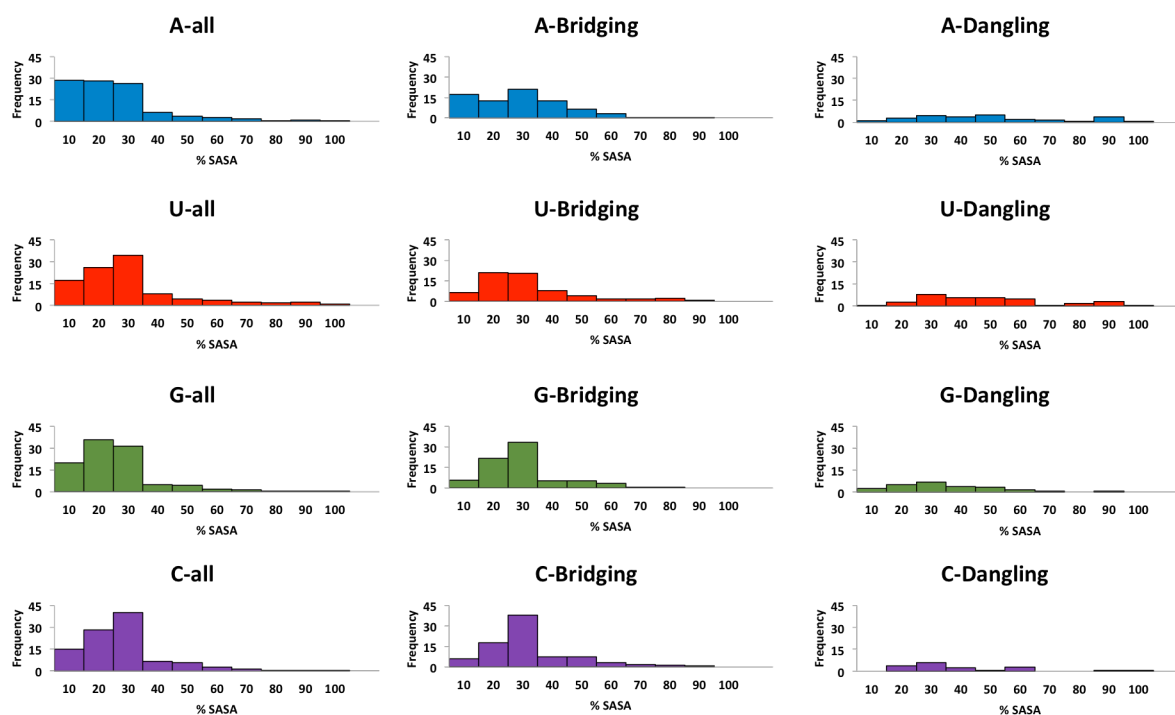

**Figure S4.** Frequencies of nucleobases at different solvent accessible surface area (SASA) percentage ranges: all the nucleobases in the dataset of 293 PDBs (left), nucleobases found stacked to bridging waters (middle), and nucleobases found stacked to dangling waters (right). The SASA values were calculated with FreeSASA (Simon Mitternacht, 2016, FreeSASA: An open source C library for solvent accessible surface area calculation. F1000Research 5:189; doi: 10.12688/f1000research.7931.1), by setting a standard probe radius of 1.4 Å. For each of the four nucleobases, a maximum SASA value was set at the value obtained for the most exposed nucleobase of that type in the analysed dataset. These maximum values were: 247.3 Å<sup>2</sup> for A, from A8 in 1NLC\_A; 214.7 Å<sup>2</sup> for U, from U19 in 2OIU\_P; 273.2 Å<sup>2</sup> for G, from G1 in 1B7F\_P; and 218.4 Å<sup>2</sup> for C, from C122 in 1S72\_9. Visual check confirmed that the above bases are fully exposed to the solvent in the corresponding RNA structures. The percentage SASA for each nucleobase was then obtained by dividing the measured SASA by the maximum value possible for that nucleobase and multiplying by 100.

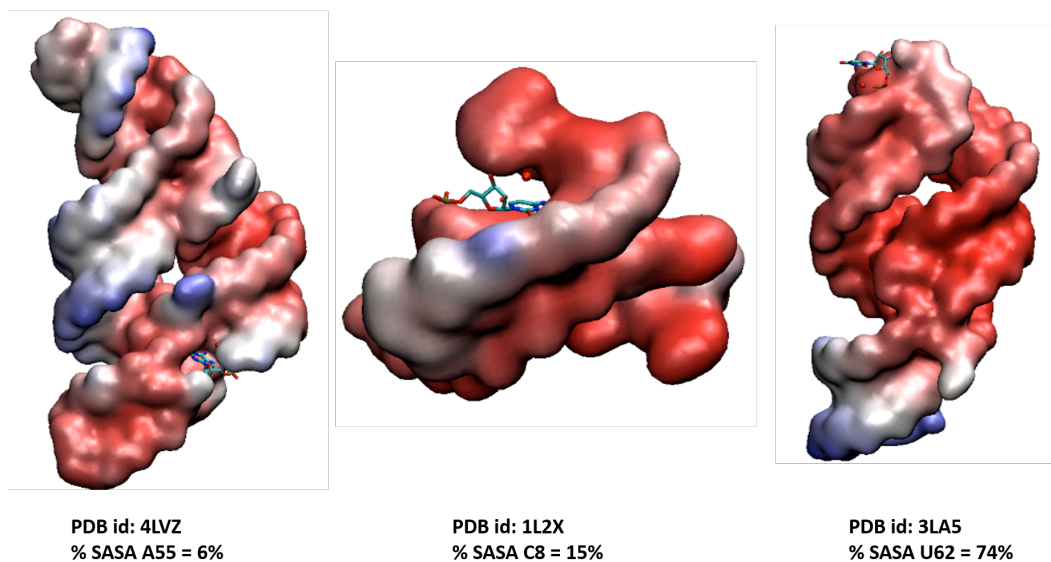

**Figure S5.** Examples of bridging water-nucleobase stacking interactions at representative values of % SASA: 6, 15 and 74 %. A surface representation of the RNA structure is given, while the stacked nucleobase is shown in stick and the stacked water as a little red sphere centered on its oxygen atom.

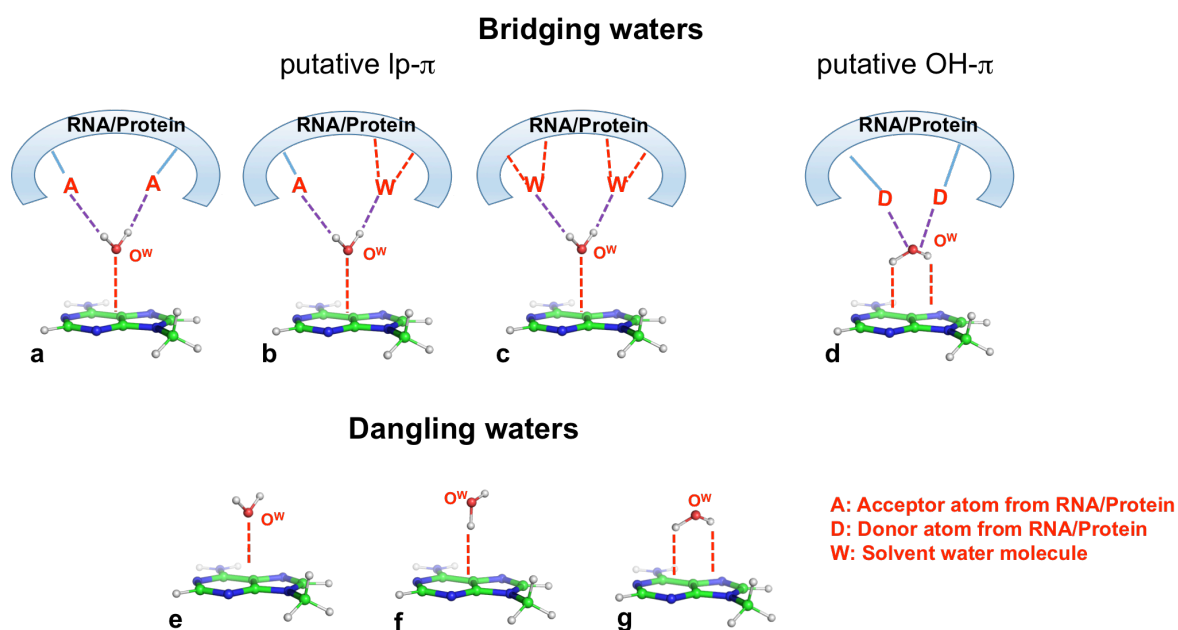

**Figure S6.** Schematic representation of bridging stacking waters (top panel, **a-d**) and dangling stacking waters (bottom panel, **e-g**). In the top panel, a schematic representation of the structural context is provided, when leading to a possible assignment of the interactions as lp- $\pi$  (**a-c**) or OH- $\pi$  (**d**). In the putative lp- $\pi$  interactions, both the hydrogen atoms on O<sup>W</sup> appear to be engaged in H-bonds with acceptor atoms from surrounding residues, while in the OH- $\pi$  interactions both the lone pairs on O<sup>W</sup> appear to be engaged in H-bonds with donor atoms from surrounding residues. Ambiguous cases, where only one hydrogen/lone pair on O<sup>W</sup> is at H-bonding distance from an acceptor/donor atom from surrounding residues, are not shown. “A” stands for an acceptor atom from the RNA/Protein and “W” for a crystal water. The blue curve, representing the RNA/protein surrounding at H-bonding distance from the stacked water is clearly absent in case of the dangling waters.

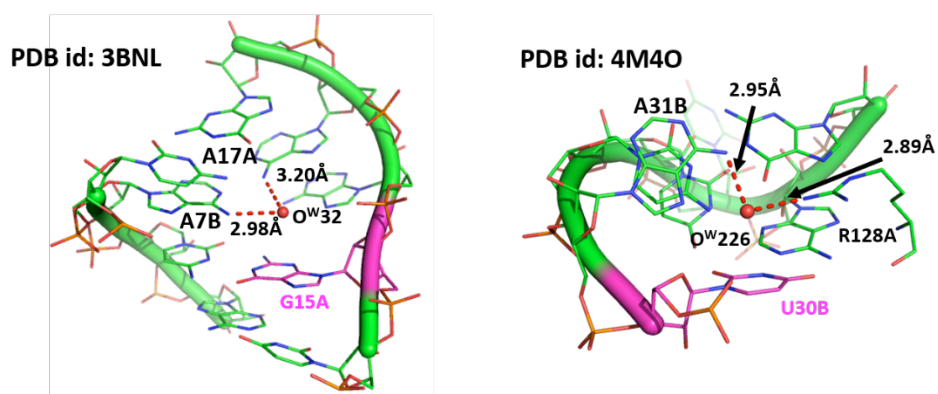

**Figure S7.** Examples of water-nucleobase stacking contacts where the  $O^W$  (represented as a small red sphere) was found at H-bond distance from two heavy donor atoms, thus representing putative OH- $\pi$  stacking contacts. The nucleobases involved in the stacking contacts are in magenta. Red dashed lines represent the distances between the donors and  $O^W$  atom.

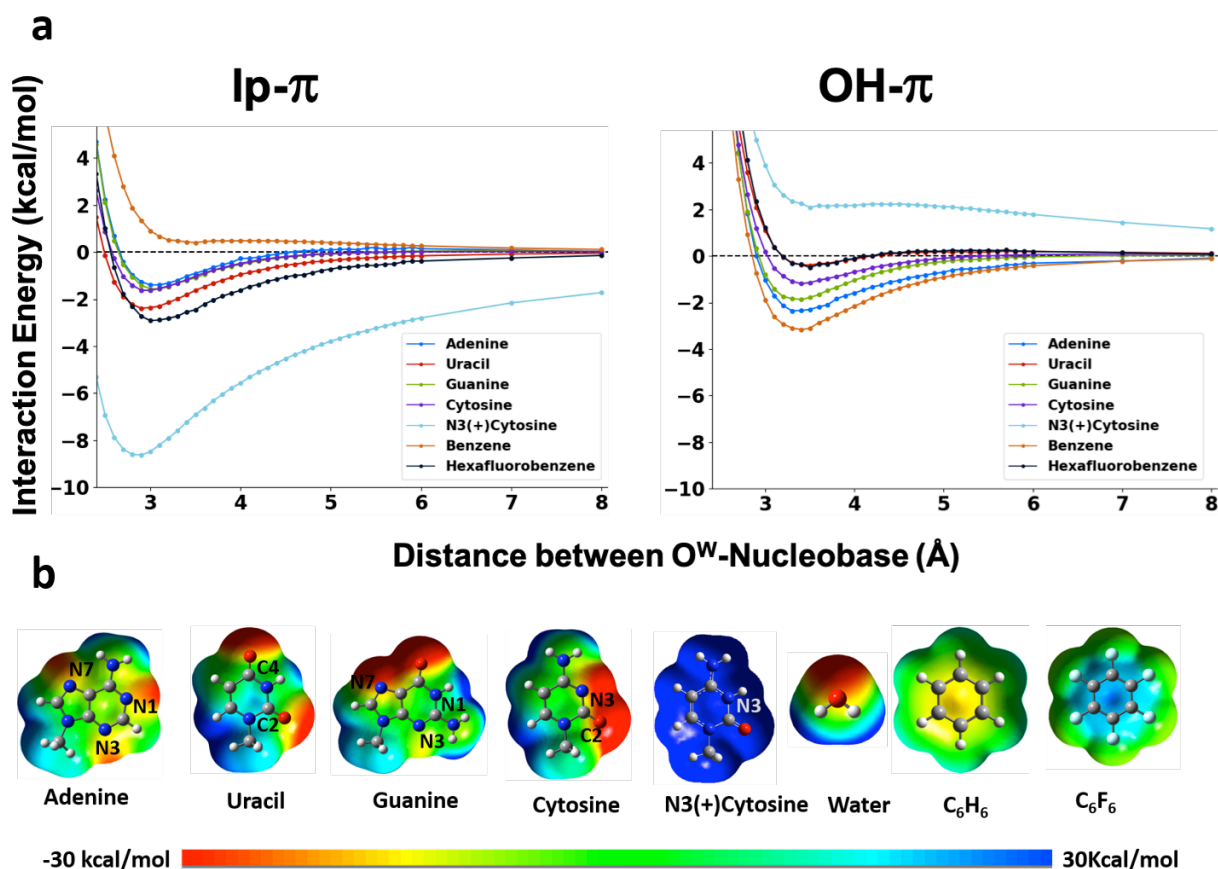

**Figure S8. a)** Potential Energy Curves for all the nucleobases (A, U, G, C, and C<sup>+</sup>), benzene and hexafluorobenzene, with water oriented to give rise to pure lp- $\pi$  (left) and OH- $\pi$  (right) interactions. Interaction energies in kcal/mol (y-axis) are reported *versus* the O<sup>W</sup>-ring distances, varying between 2.4 Å and 8.0 Å (x-axis); **b)** electrostatic potentials of nucleobases, water, benzene and hexafluorobenzene. Electrostatic potentials were mapped on electron density isosurfaces corresponding to a value of 0.0004 atomic units, and are scaled between -30 and 30 kcal/mol.



| <b>lp-<math>\pi</math></b> | 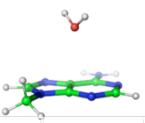 |  |  |  |  |  |  |
|----------------------------|-----------------------------------------------------------------------------------|-----------------------------------------------------------------------------------|-----------------------------------------------------------------------------------|------------------------------------------------------------------------------------|-------------------------------------------------------------------------------------|-------------------------------------------------------------------------------------|-------------------------------------------------------------------------------------|
|                            | A                                                                                 | G                                                                                 | C                                                                                 | U                                                                                  | C+                                                                                  | C <sub>6</sub> H <sub>6</sub>                                                       | C <sub>6</sub> F <sub>6</sub>                                                       |
| E(DLPNO)                   | -1.40                                                                             | -1.56                                                                             | -1.64                                                                             | -2.36                                                                              | -8.50                                                                               | 0.91                                                                                | -2.91                                                                               |
| E(PBE0)                    | 0.53                                                                              | 0.33                                                                              | -0.02                                                                             | -1.04                                                                              | -7.66                                                                               | 2.79                                                                                | -1.80                                                                               |
| E(PBE0-D3)                 | -1.03                                                                             | -1.24                                                                             | -1.48                                                                             | -2.48                                                                              | -9.14                                                                               | 1.43                                                                                | -3.21                                                                               |

  

| <b>OH-<math>\pi</math></b> |  |  |  |  |  |  |  |
|----------------------------|-----------------------------------------------------------------------------------|-----------------------------------------------------------------------------------|-----------------------------------------------------------------------------------|------------------------------------------------------------------------------------|-------------------------------------------------------------------------------------|-------------------------------------------------------------------------------------|-------------------------------------------------------------------------------------|
|                            | A                                                                                 | G                                                                                 | C                                                                                 | U                                                                                  | C+                                                                                  | C <sub>6</sub> H <sub>6</sub>                                                       | C <sub>6</sub> F <sub>6</sub>                                                       |
| E(DLPNO)                   | -2.30                                                                             | -1.79                                                                             | -1.15                                                                             | -0.40                                                                              | 2.09                                                                                | -3.11                                                                               | -0.49                                                                               |
| E(PBE0)                    | -1.03                                                                             | -0.36                                                                             | 0.30                                                                              | 0.94                                                                               | 3.79                                                                                | -2.07                                                                               | 1.01                                                                                |
| E(PBE0-D3)                 | -2.64                                                                             | -1.98                                                                             | -1.27                                                                             | -0.61                                                                              | 2.20                                                                                | -3.52                                                                               | -0.49                                                                               |

**Figure S9.** Geometries and energies of model geometries corresponding to lp- $\pi$  and OH- $\pi$  interactions between water and the aromatic ring of the four nucleobases, of benzene and of hexafluorobenzene. Energies were calculated at reference DLPNO/CBS; and PBE0/TZVP that corresponds to electrostatic energy contribution and PBE0-D3/TZVP that includes the explicit dispersion contribution for interaction energy calculation.

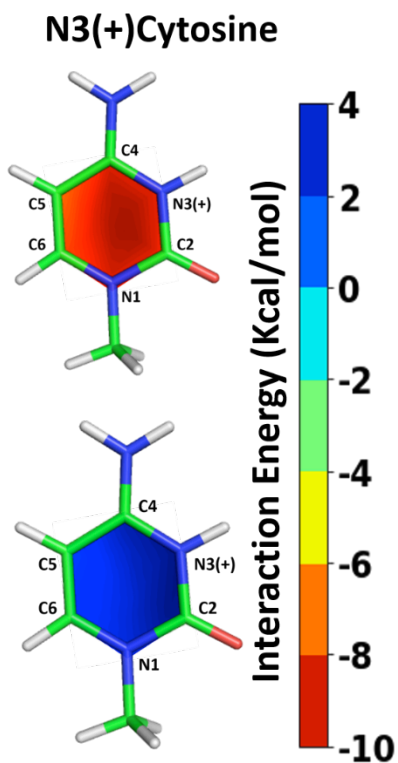

**Figure S10.** Contour diagrams showing the interaction energies for the  $lp-\pi$  and  $OH-\pi$  interactions between water and the N3-protonated cytosine ( $C^+$ ) base. Energy values are color coded, from red (-10 kcal/mol) to blue (+4 kcal/mol). Single point energies were calculated for both the types of interaction on a grid made of 4 points for each line connecting the nucleobase centroid to each atom of the ring. Water-nucleobase distances were frozen at 3.0 Å and 3.5 Å for the  $lp-\pi$  and the  $OH-\pi$  interaction, respectively.

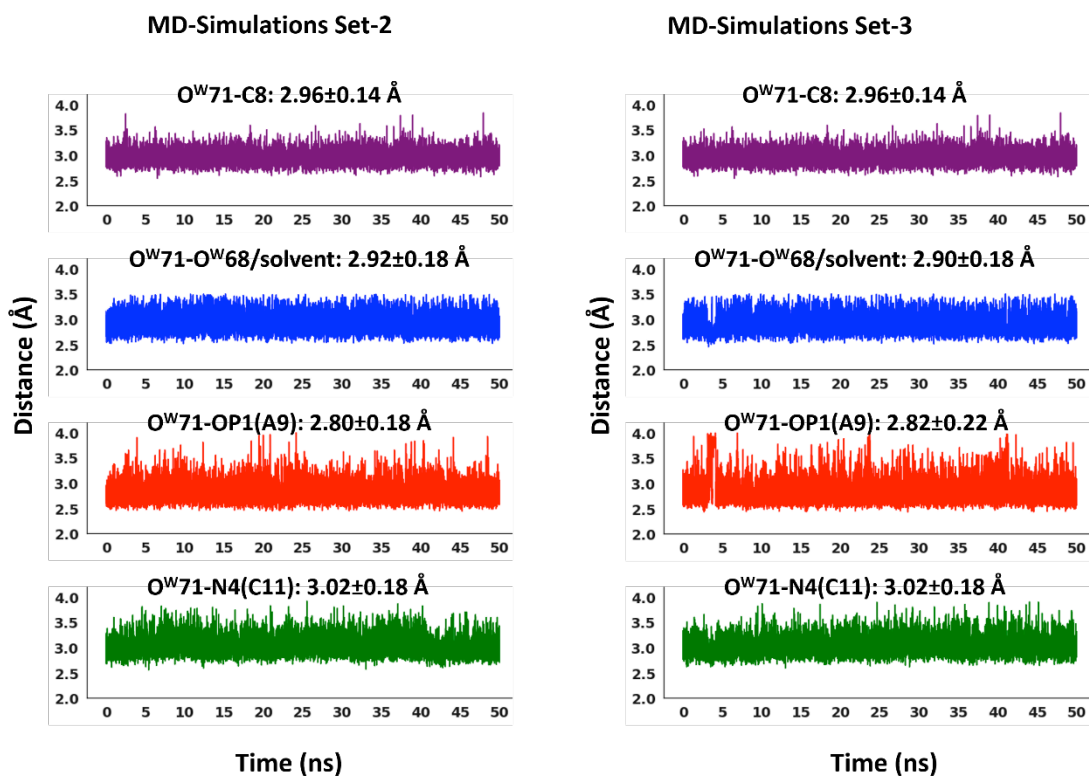

**Figure S11.** Time evolution of all the relevant distances for the  $O^W71$ -C8 stacking contact from the other two sets of independent MD trajectories. The color code of the plots is the same used in Figure 7. Average distance and standard deviation values are also given in the relative plots.

### MD Simulations Set-2

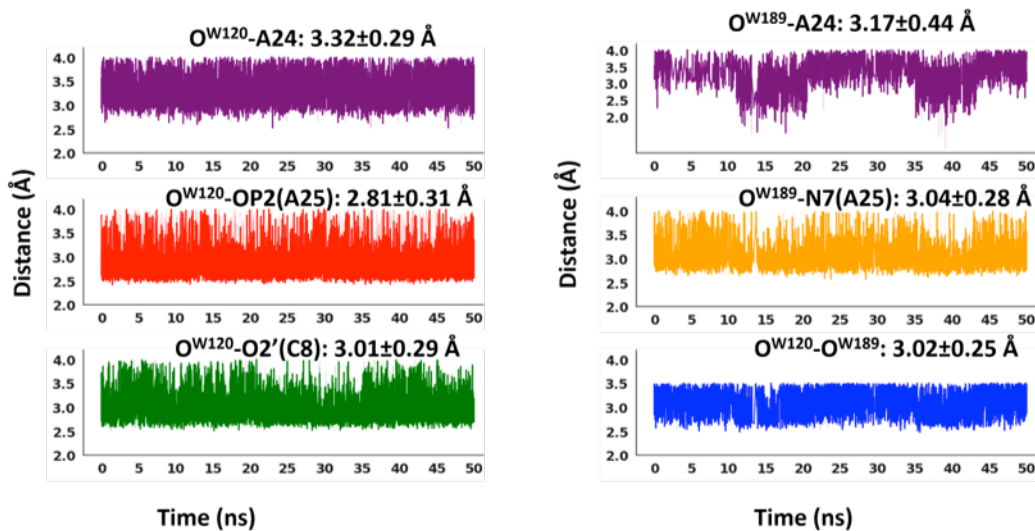

### MD Simulations Set-3

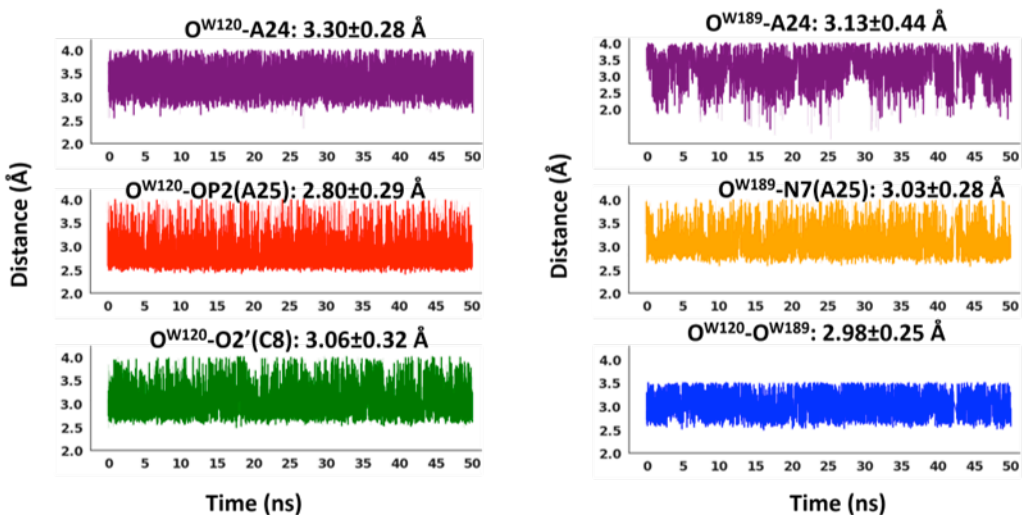

**Figure S12.** Time evolution of the relevant distances for the A24-O<sup>W120</sup>/ O<sup>W189</sup> stacking contact from the other two sets of independent MD trajectories. The color code of the plots is the same used in Figure 8. Average distance and standard deviation values are also given in the relative plots.

## Molecular dynamics simulations results for the two water-nucleobase stacking contacts involving dangling waters: O<sup>W</sup>175-A9 and O<sup>W</sup>73-A20

Regarding the O<sup>W</sup>175-A9 contact, analysis of our three independent MD trajectories evidenced that a water molecule remains stacked on the A9 base (although O<sup>W</sup>175 gets replaced by bulk solvent waters) under dynamic conditions (in ~92% of the frames), maintaining an OH- $\pi$  interaction. In the figure below, the average distance between O<sup>W</sup>175 and the A9 base plane is reported for the three simulations.

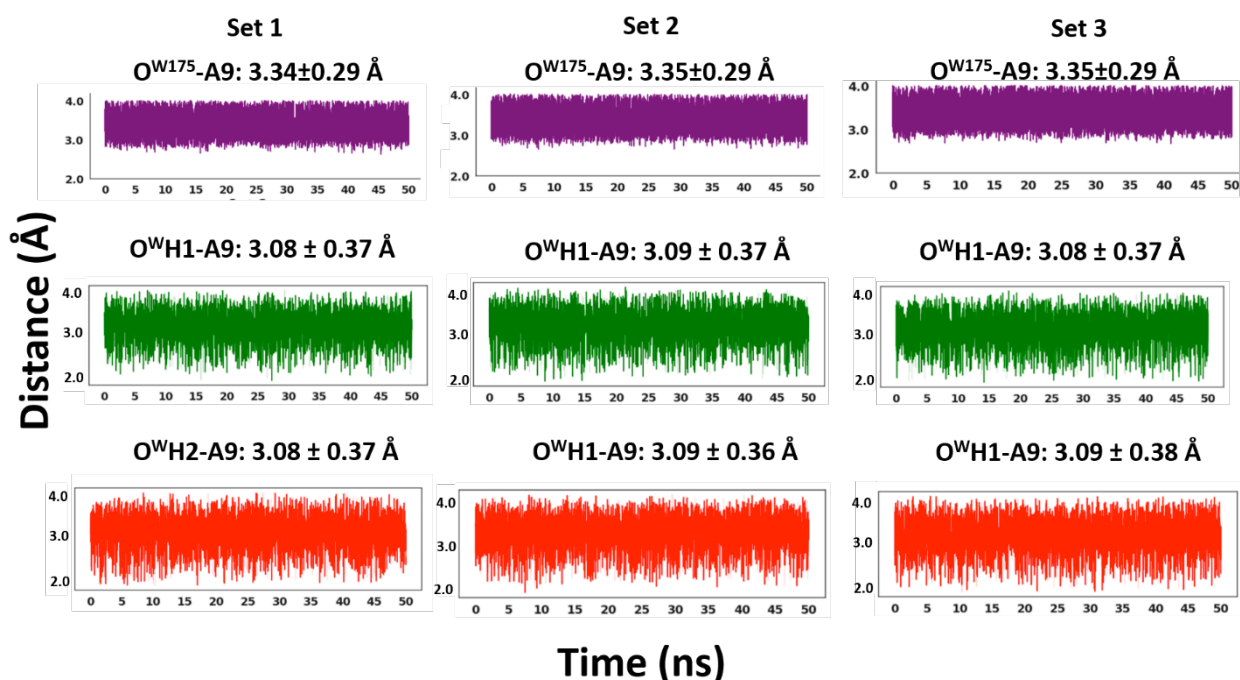

**Figure S13.** Time evolution of the distances between the oxygen and the hydrogen atoms of water-175 and the plane of nucleobase A9 for the three performed simulations. Average distance and standard deviation values are also given in the relative plots. Only frames matching both a NP-O<sup>W</sup> distance < 4.0 Å and one between the NP-O-H angles < 90° are considered in the analysis.

As for the O<sup>W</sup>73-A20 contact, it is clearly unstable under dynamic conditions. During the simulation time, indeed, O<sup>W</sup>73 does not remain at stacking distance from the A20 nucleobase, apart from a fraction of frames, ranging between 20% and 39% for the three simulations (see the Figure below, reporting the distance along the simulation time between O<sup>W</sup>73 and the A20 plane).

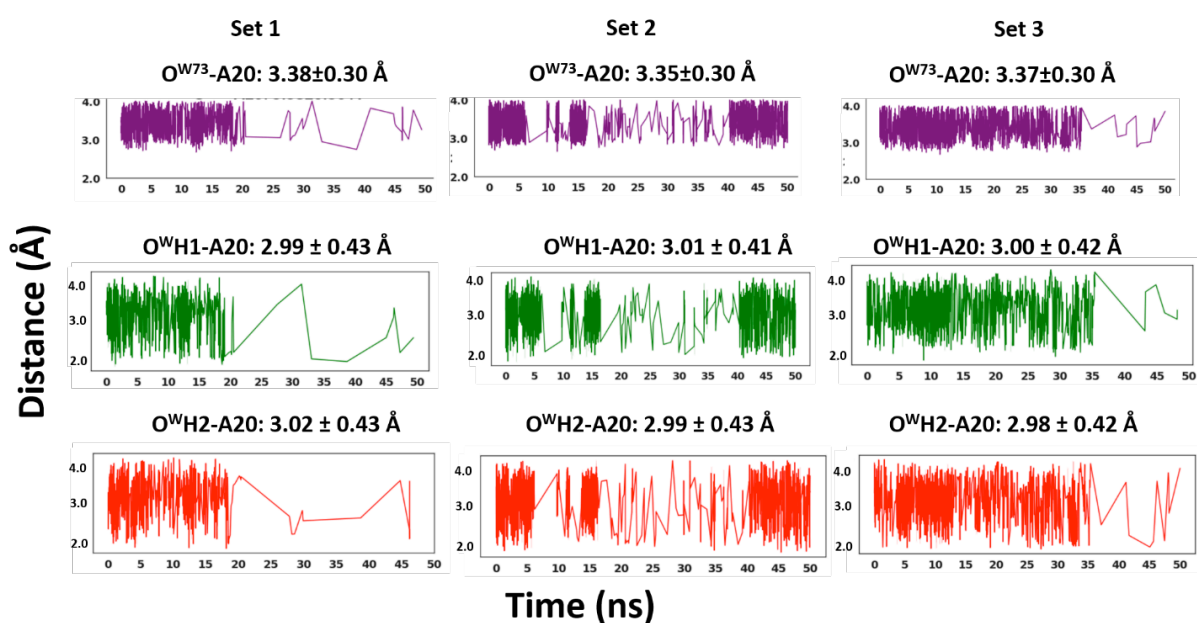

**Figure S14.** The time evolution of the distances between the oxygen and the hydrogen atoms of water-73 and the plane of nucleobase A20 is reported for the three performed simulations. Average distance and standard deviation values, calculated only on the frames where the contact is maintained (20%, 35% and 39%, respectively), are also given in the relative plots. Only frames matching both a NP-O<sup>W</sup> distance < 4.0 Å and one between the NP-O-H angles < 90° are considered in the analysis.

**Table S1.** Instances of nucleobase-water stacking contacts with specification of involved nucleobase and water, PDB ID, and water oxygen EDIA (Electron Density for Individual Atoms) value (it is “NA” for water molecules for which the EDIA value could not be obtained, as the electron density map is not available for the corresponding X-ray structure). Putative protonated A and C nucleobases are indicated by adding a + sign to the nucleobase in the first column.

| Nucleobase                      | Water      | PDB ID | EDIA |
|---------------------------------|------------|--------|------|
| Adenine-Water Stacking Contacts |            |        |      |
| A_0_1117                        | HOH_0_6023 | 1s72   | 0.65 |
| A_0_1123                        | HOH_0_5521 | 1s72   | 0.24 |
| A_0_1132                        | HOH_0_3419 | 1s72   | 0.15 |
| A_0_1150                        | HOH_G_4499 | 1s72   | 0.82 |
| A_0_120                         | HOH_2_3012 | 1s72   | 0.83 |
| A_0_1200                        | HOH_0_5253 | 1s72   | 0.17 |
| A_0_1232                        | HOH_0_8805 | 1s72   | 0.42 |
| A_0_1487                        | HOH_0_7109 | 1s72   | 0.15 |
| A_0_1502                        | HOH_0_9437 | 1s72   | 0.48 |
| A_0_1572                        | HOH_0_5162 | 1s72   | 0.10 |
| A_0_1653                        | HOH_0_3547 | 1s72   | 0.18 |
| A_0_1653                        | HOH_0_9279 | 1s72   | 0.66 |
| A_0_1712                        | HOH_0_5765 | 1s72   | 0.25 |
| A_0_1733                        | HOH_0_9660 | 1s72   | 0.43 |
| A_0_1836                        | HOH_0_4875 | 1s72   | 0.58 |
| A_0_1839                        | HOH_0_5023 | 1s72   | 0.28 |
| A_0_1840                        | HOH_0_8621 | 1s72   | 0.54 |
| A_0_189                         | HOH_0_8616 | 1s72   | 0.31 |
| A_0_2038                        | HOH_B_8622 | 1s72   | 0.35 |
| A_0_2062                        | HOH_0_4160 | 1s72   | 0.47 |
| A_0_2101                        | HOH_0_8836 | 1s72   | 0.53 |
| A_0_2238                        | HOH_0_6164 | 1s72   | 0.17 |
| A_0_2455                        | HOH_0_3599 | 1s72   | 0.29 |
| A_0_2460                        | HOH_0_4312 | 1s72   | 0.84 |
| A_0_2483                        | HOH_0_3803 | 1s72   | 0.91 |
| A_0_2485-(+)                    | HOH_0_9765 | 1s72   | 0.23 |
| A_0_2488                        | HOH_0_4290 | 1s72   | 0.43 |
| A_0_2509                        | HOH_0_6222 | 1s72   | 0.41 |
| A_0_2509                        | HOH_0_8756 | 1s72   | 0.47 |
| A_0_2697                        | HOH_0_4105 | 1s72   | 0.82 |
| A_0_2743                        | HOH_0_5576 | 1s72   | 0.24 |
| A_0_2840                        | HOH_0_7140 | 1s72   | 0.16 |
| A_0_2896                        | HOH_X_4132 | 1s72   | 0.19 |
| A_0_331                         | HOH_0_6338 | 1s72   | 0.01 |

|          |            |      |      |
|----------|------------|------|------|
| A_0_37   | HOH_0_4186 | 1s72 | 0.40 |
| A_0_395  | HOH_0_9812 | 1s72 | 0.41 |
| A_0_442  | HOH_0_9794 | 1s72 | 0.38 |
| A_0_459  | HOH_0_4174 | 1s72 | 0.64 |
| A_0_462  | HOH_0_4383 | 1s72 | 0.21 |
| A_0_513  | HOH_2_7177 | 1s72 | 0.40 |
| A_0_513  | HOH_2_7692 | 1s72 | 0.56 |
| A_0_565  | HOH_0_4500 | 1s72 | 0.02 |
| A_0_67   | HOH_S_8339 | 1s72 | 0.47 |
| A_0_674  | HOH_0_4441 | 1s72 | 0.44 |
| A_0_721  | HOH_0_9863 | 1s72 | 0.62 |
| A_0_766  | HOH_0_4679 | 1s72 | 0.41 |
| A_0_867  | HOH_0_8845 | 1s72 | 0.57 |
| A_0_907  | HOH_0_5051 | 1s72 | 0.56 |
| A_0_922  | HOH_0_8846 | 1s72 | 0.77 |
| A_0_923  | HOH_0_3803 | 1s72 | 0.91 |
| A_0_923  | HOH_0_5533 | 1s72 | 0.61 |
| A_0_939  | HOH_0_3152 | 1s72 | 0.51 |
| A_9_3    | HOH_9_8477 | 1s72 | 0.12 |
| A_9_52   | HOH_9_8392 | 1s72 | 0.04 |
| A_A_1    | HOH_A_2003 | 4un3 | 0.77 |
| A_A_1311 | HOH_A_5103 | 4qcn | NA   |
| A_A_14   | HOH_A_1099 | 2qwy | 0.24 |
| A_A_17   | HOH_A_158  | 3td0 | 0.83 |
| A_A_18   | HOH_A_164  | 3td0 | 0.72 |
| A_A_1817 | HOH_A_4013 | 4qcn | NA   |
| A_A_1992 | HOH_A_4016 | 4qcn | NA   |
| A_A_1993 | HOH_A_4825 | 4qcn | NA   |
| A_A_2    | HOH_A_134  | 4u34 | 0.94 |
| A_A_2    | HOH_A_137  | 4u35 | 0.53 |
| A_A_20   | HOH_A_73   | 1l2x | 0.76 |
| A_A_2082 | HOH_A_5134 | 4qcn | NA   |
| A_A_21   | HOH_A_661  | 2a43 | 0.53 |
| A_A_22   | HOH_A_2040 | 4bw0 | 0.55 |
| A_A_24   | HOH_A_120  | 1l2x | 0.73 |
| A_A_24   | HOH_A_189  | 1l2x | 0.45 |
| A_A_24   | HOH_A_544  | 2a43 | 0.92 |
| A_A_24   | HOH_A_551  | 2a43 | 0.73 |
| A_A_2497 | HOH_A3682  | 4kj9 | NA   |
| A_A_2614 | HOH_A_4045 | 4qcn | NA   |
| A_A_29   | HOH_A_2140 | 3zp8 | 0.81 |
| A_A_335  | HOH_A_4019 | 4qcn | NA   |
| A_A_4    | HOH_A_79   | 3nj6 | 0.99 |
| A_A_43   | HOH_A_123  | 3d2v | 0.70 |
| A_A_50   | HOH_A_173  | 3d2v | 0.59 |
| A_A_53   | HOH_B_59   | 3tzt | 0.39 |



|           |            |      |      |
|-----------|------------|------|------|
| A_A_55    | HOH_A_399  | 4lvz | 0.95 |
| A_A_6     | HOH_A_17   | 283d | NA   |
| A_A_62    | HOH_A_453  | 4lvz | 0.75 |
| A_A_7     | HOH_A_16   | 3nj6 | 0.93 |
| A_A_7     | HOH_A_21   | 3nj7 | 0.94 |
| A_A_7     | HOH_A_46   | 3nj7 | 0.49 |
| A_A_7     | HOH_A_68   | 3nj6 | 0.94 |
| A_A_72    | HOH_A_231  | 4jf2 | 0.96 |
| A_A_9     | HOH_A_71   | 2r22 | 0.97 |
| A_A_9     | HOH_A_80   | 2r20 | 0.77 |
| A_A_9     | HOH_A_95   | 1u0b | 0.39 |
| A_B_1492  | HOH_A_156  | 2oe5 | 0.81 |
| A_B_15    | HOH_B_191  | 1d4r | 0.35 |
| A_B_20    | HOH_B_104  | 3cgp | 0.74 |
| A_B_20    | HOH_B_117  | 3cgp | 0.74 |
| A_B_20    | HOH_B_52   | 3ibk | 0.35 |
| A_B_20    | HOH_B_86   | 3cgr | 0.65 |
| A_B_22    | HOH_B_106  | 2r20 | 0.66 |
| A_B_23    | HOH_B_194  | 3d2v | 0.20 |
| A_B_27    | HOH_B_222  | 2hw8 | 0.53 |
| A_B_304   | HOH_B_1278 | 1et4 | 0.55 |
| A_B_31    | HOH_B_2008 | 4aq7 | 0.86 |
| A_B_38    | HOH_B_2059 | 2vpl | 0.16 |
| A_B_38    | HOH_B_2064 | 2vpl | 0.08 |
| A_B_38(+) | HOH_B_82   | 3rg5 | 0.35 |
| A_B_39    | HOH_B_302  | 2fqn | 0.82 |
| A_B_40    | HOH_B_165  | 3td0 | 0.77 |
| A_B_404   | HOH_B_623  | 1k8w | 0.49 |
| A_B_413   | HOH_A_523  | 1k8w | 0.99 |
| A_B_44    | HOH_A_666  | 4n0t | 0.91 |
| A_B_45    | HOH_B_215  | 4n0t | 0.86 |
| A_B_5     | HOH_A_158  | 3q0q | 0.59 |
| A_B_50    | HOH_B_310  | 3d2v | 0.67 |
| A_B_56    | HOH_B_386  | 3egz | 0.58 |
| A_B_56    | HOH_B_395  | 4n0t | 0.75 |
| A_B_56    | HOH_B_434  | 3egz | 0.56 |
| A_B_57    | HOH_B_332  | 3d2v | 0.52 |
| A_B_57    | HOH_B_506  | 3nkb | 0.59 |
| A_B_58    | HOH_B_144  | 3ivn | 0.55 |
| A_B_6     | HOH_A_47   | 3q0s | 0.78 |
| A_B_68    | HOH_B_159  | 1csl | 0.67 |
| A_B_7     | HOH_A_139  | 3k62 | 0.90 |
| A_B_7     | HOH_A_149  | 3k5z | 0.64 |
| A_B_7     | HOH_A_262  | 1g2e | 0.48 |
| A_B_7     | HOH_A_576  | 3k5y | 0.48 |
| A_B_7     | HOH_B_17   | 3nj7 | 0.92 |

|          |            |      |      |
|----------|------------|------|------|
| A_B_7    | HOH_B_2047 | 2atw | 0.85 |
| A_B_7    | HOH_B_34   | 3nj7 | 0.76 |
| A_B_8    | HOH_B_1009 | 3dd2 | 0.84 |
| A_B_93   | HOH_B_264  | 4n0t | 0.68 |
| A_C_11   | HOH_C_218  | 1t0e | 0.74 |
| A_C_11   | HOH_C_50   | 1m8y | 0.81 |
| A_C_12   | HOH_C_102  | 4ig8 | 0.12 |
| A_C_1284 | HOH_C_1350 | 1n35 | 0.24 |
| A_C_15   | HOH_A_2051 | 4c8z | 0.65 |
| A_C_15   | HOH_A_362  | 1q96 | 0.79 |
| A_C_15   | HOH_C_376  | 1q96 | 0.68 |
| A_C_16   | HOH_A_119  | 1m8w | 0.72 |
| A_C_16   | HOH_C_227  | 3ova | 0.85 |
| A_C_17   | HOH_C_227  | 3ova | 0.85 |
| A_C_3    | HOH_A_408  | 3t5n | 0.48 |
| A_C_35   | HOH_A_340  | 2zm5 | 0.79 |
| A_C_4    | HOH_A_113  | 3q0p | 0.36 |
| A_C_4    | HOH_B_370  | 4mdx | 0.81 |
| A_C_416  | HOH_C_1605 | 1et4 | 0.48 |
| A_C_57   | HOH_C_1025 | 2pn4 | 0.79 |
| A_C_7    | HOH_C_18   | 3nj7 | 0.92 |
| A_C_7    | HOH_C_26   | 3nj7 | 0.84 |
| A_C_76   | HOH_C_520  | 2fmt | NA   |
| A_D_109  | HOH_D_16   | 3p59 | 0.87 |
| A_D_11   | HOH_D_218  | 1m8y | 0.46 |
| A_D_15   | HOH_D_176  | 1yz9 | 0.51 |
| A_D_16   | HOH_B_256  | 1m8w | 0.55 |
| A_D_1953 | HOH_D_2027 | 2bh2 | NA   |
| A_D_2    | HOH_D_210  | 4m30 | 0.13 |
| A_D_30   | HOH_D_2034 | 2vpl | 0.21 |
| A_D_37   | HOH_D_550  | 2fmt | NA   |
| A_D_4    | HOH_D_112  | 3nj7 | 0.8  |
| A_D_5    | HOH_D_117  | 4ht9 | 0.49 |
| A_D_58   | HOH_D_203  | 4nku | 0.5  |
| A_D_7    | HOH_D_15   | 3nj7 | 0.97 |
| A_D_7    | HOH_D_44   | 3nj7 | 0.66 |
| A_D_76   | HOH_D_523  | 2fmt | NA   |
| A_E_1    | HOH_B_448  | 1ytu | 0.67 |
| A_E_116  | HOH_E_1284 | 1et4 | 0.48 |
| A_E_29   | HOH_A_447  | 3eph | 0.28 |
| A_E_54   | HOH_E_112  | 3p59 | 0.72 |
| A_E_7    | HOH_E_24   | 3nj7 | 0.86 |
| A_E_7    | HOH_E_38   | 3nj7 | 0.73 |
| A_F_2    | HOH_F_174  | 3gpq | 0.37 |
| A_F_22   | HOH_F_2024 | 2y9h | 0.48 |
| A_F_37   | HOH_F_45   | 1q2r | 0.24 |

|                                |            |      |      |
|--------------------------------|------------|------|------|
| A_F_39                         | HOH_F_99   | 3rw6 | 0.49 |
| A_F_44                         | HOH_F_75   | 3rw6 | 0.69 |
| A_F_58                         | HOH_F_88   | 3eph | 0.82 |
| A_F_7                          | HOH_F_20   | 3nj7 | 0.83 |
| A_F_7                          | HOH_F_48   | 3nj7 | 0.66 |
| A_H_3                          | HOH_B_2059 | 4b3g | 0.56 |
| A_H_4                          | HOH_H_2003 | 4b3g | 0.26 |
| A_H_40                         | HOH_H_64   | 3rw6 | 0.92 |
| A_P_7                          | HOH_P_181  | 3ok4 | 0.81 |
| A_R_12                         | HOH_A_2041 | 2bu1 | 0.45 |
| A_R_3                          | HOH_R_66   | 2tmv | NA   |
| A_R_38                         | HOH_R_275  | 4kzd | 0.43 |
| A_R_65                         | HOH_R_992  | 1b23 | 0.03 |
| A_R_68                         | HOH_R_10   | 3iab | 0.50 |
| A_S_2                          | HOH_Q_101  | 4g7o | 0.42 |
| A_V_4                          | HOH_N_150  | 3ok4 | 0.77 |
| A_X_105                        | HOH_X_371  | 2qbz | 0.24 |
| A_X_15 (+)                     | HOH_X_120  | 3wbm | 0.87 |
| A_X_41                         | HOH_X_404  | 2gdi | 0.45 |
| A_X_44                         | HOH_X_451  | 2gdi | 0.79 |
| A_X_503                        | HOH_X_704  | 4peh | 0.69 |
| A_X_61                         | HOH_X_431  | 2qbz | 0.36 |
| A_X_75                         | HOH_X_373  | 2gdi | 0.63 |
| A_Y_44                         | HOH_Y_343  | 2gdi | 0.39 |
| A_Y_41                         | HOH_Y_303  | 2gdi | 0.26 |
| Uracil-Water Stacking Contacts |            |      |      |
| U_0_1009                       | HOH_0_3800 | 1s72 | 0.83 |
| U_0_1017                       | HOH_0_9564 | 1s72 | 0.27 |
| U_0_1047                       | HOH_0_4097 | 1s72 | 0.62 |
| U_0_1062                       | HOH_0_9365 | 1s72 | 0.55 |
| U_0_1109                       | HOH_J_247  | 1s72 | 0.78 |
| U_0_1136                       | HOH_0_4468 | 1s72 | 0.40 |
| U_0_1220                       | HOH_0_5489 | 1s72 | 0.21 |
| U_0_1264                       | HOH_0_3068 | 1s72 | 0.62 |
| U_0_1310                       | HOH_0_5322 | 1s72 | 0.21 |
| U_0_1359                       | HOH_0_4211 | 1s72 | 0.36 |
| U_0_1446                       | HOH_S_8344 | 1s72 | 0.54 |
| U_0_1447                       | HOH_0_6288 | 1s72 | 0.42 |
| U_0_1454                       | HOH_0_4793 | 1s72 | 0.53 |
| U_0_1473                       | HOH_0_9258 | 1s72 | 0.23 |
| U_0_1488                       | HOH_0_8837 | 1s72 | 0.22 |
| U_0_1503                       | HOH_0_9132 | 1s72 | 0.47 |
| U_0_1696                       | HOH_0_6912 | 1s72 | 0.81 |
| U_0_170                        | HOH_0_8545 | 1s72 | 0.52 |
| U_0_170                        | HOH_0_8675 | 1s72 | 0.57 |
| U_0_1724                       | HOH_0_4194 | 1s72 | 0.32 |

|          |            |      |      |
|----------|------------|------|------|
| U_0_1771 | HOH_0_4322 | 1s72 | 0.31 |
| U_0_1813 | HOH_0_6210 | 1s72 | 0.20 |
| U_0_1835 | HOH_0_9532 | 1s72 | 0.39 |
| U_0_1838 | HOH_0_5023 | 1s72 | 0.28 |
| U_0_1850 | HOH_0_5230 | 1s72 | 0.63 |
| U_0_1890 | HOH_0_4580 | 1s72 | 0.38 |
| U_0_1980 | HOH_0_8778 | 1s72 | 0.59 |
| U_0_2059 | HOH_0_9467 | 1s72 | 0.57 |
| U_0_2117 | HOH_0_4348 | 1s72 | 0.48 |
| U_0_2278 | HOH_0_6216 | 1s72 | 0.62 |
| U_0_2330 | HOH_0_3494 | 1s72 | 0.47 |
| U_0_2419 | HOH_0_8632 | 1s72 | 0.83 |
| U_0_2424 | HOH_0_8614 | 1s72 | 0.51 |
| U_0_2473 | HOH_0_6717 | 1s72 | 0.55 |
| U_0_2484 | HOH_0_9127 | 1s72 | 0.41 |
| U_0_2512 | HOH_0_4846 | 1s72 | 0.56 |
| U_0_2541 | HOH_0_6922 | 1s72 | 0.79 |
| U_0_2645 | HOH_0_5553 | 1s72 | 0.56 |
| U_0_2837 | HOH_B_8579 | 1s72 | 0.15 |
| U_0_325  | HOH_0_5053 | 1s72 | 0.13 |
| U_0_374  | HOH_0_8538 | 1s72 | 0.84 |
| U_0_454  | HOH_0_3591 | 1s72 | 0.08 |
| U_0_454  | HOH_0_8546 | 1s72 | 0.22 |
| U_0_488  | HOH_0_3563 | 1s72 | 0.76 |
| U_0_55   | HOH_0_4853 | 1s72 | 0.38 |
| U_0_651  | HOH_0_9519 | 1s72 | 0.57 |
| U_0_675  | HOH_0_4494 | 1s72 | 0.47 |
| U_0_713  | HOH_0_3450 | 1s72 | 0.15 |
| U_0_713  | HOH_0_9645 | 1s72 | 0.25 |
| U_0_714  | HOH_0_5515 | 1s72 | 0.63 |
| U_0_753  | HOH_0_5024 | 1s72 | 0.37 |
| U_0_777  | HOH_0_7071 | 1s72 | 0.36 |
| U_0_779  | HOH_0_5003 | 1s72 | 0.42 |
| U_0_831  | HOH_0_8880 | 1s72 | 0.72 |
| U_0_840  | HOH_0_6533 | 1s72 | 0.35 |
| U_0_845  | HOH_0_5153 | 1s72 | 0.67 |
| U_0_866  | HOH_0_8845 | 1s72 | 0.57 |
| U_9_82   | HOH_9_8400 | 1s72 | 0.44 |
| U_A_1006 | HOH_A_9120 | 4rkv | 0.49 |
| U_A_106  | HOH_A_206  | 3d0u | 0.81 |
| U_A_11   | HOH_A_95   | 2zy6 | 0.30 |
| U_A_1286 | HOH_A_4935 | 4qcn | NA   |
| U_A_13   | HOH_A_128  | 4e5c | 0.86 |
| U_A_13   | HOH_A_169  | 2zy6 | 0.90 |
| U_A_17   | HOH_A_559  | 2a43 | 0.80 |
| U_A_17   | HOH_A_691  | 2a43 | 0.92 |

|          |            |      |      |
|----------|------------|------|------|
| U_A_18   | HOH_A_260  | 3d2v | 0.29 |
| U_A_2    | HOH_A_221  | 4jah | 0.54 |
| U_A_2069 | HOH_A_5226 | 4qcn | NA   |
| U_A_209  | HOH_A_1208 | 1et4 | 0.34 |
| U_A_209  | HOH_A_1713 | 1et4 | 0.47 |
| U_A_223  | HOH_A_1366 | 1et4 | 0.68 |
| U_A_227  | HOH_A_1153 | 1et4 | 0.98 |
| U_A_2420 | HOH_A_4331 | 4qcn | NA   |
| U_A_2443 | HOH_A_4334 | 4qcn | NA   |
| U_A_25   | HOH_A_111  | 397d | 0.99 |
| U_A_3    | HOH_A_116  | 2g91 | NA   |
| U_A_3    | HOH_A_36   | 165d | NA   |
| U_A_31   | HOH_A_1026 | 2qwy | 0.50 |
| U_A_34   | HOH_A_337  | 3fo4 | 0.74 |
| U_A_34   | HOH_A_422  | 3la5 | 0.78 |
| U_A_36   | HOH_A_353  | 3la5 | 0.58 |
| U_A_36   | HOH_A_360  | 3fo4 | 0.74 |
| U_A_369  | HOH_A3555  | 4KJ9 | NA   |
| U_A_39   | HOH_A_254  | 4p5j | 0.92 |
| U_A_39   | HOH_A_328  | 3d2v | 0.48 |
| U_A_4    | HOH_A_108  | 4mce | 0.85 |
| U_A_4    | HOH_A_227  | 2awe | 0.32 |
| U_A_40   | HOH_A_259  | 3la5 | 1.03 |
| U_A_42   | HOH_A_258  | 4lvz | 0.93 |
| U_A_458  | HOH_A_4514 | 4qcn | NA   |
| U_A_47   | HOH_A_113  | 1i9v | NA   |
| U_A_49   | HOH_A_298  | 3la5 | 0.88 |
| U_A_49   | HOH_A_327  | 3fo4 | 0.84 |
| U_A_49   | HOH_A_711  | 4lx6 | 0.37 |
| U_A_5    | HOH_A_161  | 3gx5 | 0.23 |
| U_A_5    | HOH_A_2016 | 2vuq | 0.54 |
| U_A_5    | HOH_A_2034 | 2v7r | 0.47 |
| U_A_5    | HOH_A_29   | 255d | NA   |
| U_A_5    | HOH_A_40   | 1fuf | 1.02 |
| U_A_51   | HOH_A_215  | 4enb | 0.35 |
| U_A_6    | HOH_A_166  | 280d | 0.50 |
| U_A_6    | HOH_A_20   | 413d | NA   |
| U_A_6    | HOH_B_46   | 1fuf | 0.98 |
| U_A_62   | HOH_A_451  | 3la5 | 0.83 |
| U_A_64   | HOH_B_2105 | 4un3 | 0.80 |
| U_A_69   | HOH_A_497  | 4lvz | 0.50 |
| U_A_7    | HOH_A_27   | 422d | 0.31 |
| U_A_7    | HOH_A_5016 | 1qbp | NA   |
| U_A_7    | HOH_A_87   | 1f27 | NA   |
| U_A_80   | HOH_A_13   | 439d | 0.80 |
| U_A_80   | HOH_A_335  | 354d | NA   |

|          |            |      |      |
|----------|------------|------|------|
| U_A_814  | HOH_A_4660 | 4qcn | NA   |
| U_B_1    | HOH_A_13   | 3k62 | 0.98 |
| U_B_1    | HOH_A_131  | 3k5z | 0.67 |
| U_B_1    | HOH_A_19   | 3k64 | 0.95 |
| U_B_1    | HOH_A_19   | 3qgc | 0.89 |
| U_B_1    | HOH_A_21   | 3k5y | 0.62 |
| U_B_1    | HOH_A_31   | 3k5q | 0.78 |
| U_B_1    | HOH_A_65   | 3k61 | 0.65 |
| U_B_1    | HOH_A_8    | 3k5q | 0.74 |
| U_B_113  | HOH_B_136  | 2g3s | 0.60 |
| U_B_12   | HOH_B_103  | 4ngd | 0.76 |
| U_B_12   | HOH_B_104  | 2g91 | NA   |
| U_B_12   | HOH_B_112  | 4ngd | 0.55 |
| U_B_12   | HOH_B_340  | 1j6s | 0.47 |
| U_B_12   | HOH_B_352  | 1jzv | 0.56 |
| U_B_12   | HOH_B_42   | 165d | NA   |
| U_B_13   | HOH_B_114  | 4e5c | 0.51 |
| U_B_16   | HOH_B_128  | 4e5c | 0.89 |
| U_B_162  | HOH_B_339  | 1jid | 0.91 |
| U_B_17   | HOH_B_70   | 3sj2 | 0.70 |
| U_B_19   | HOH_B_33   | 1fuf | 0.96 |
| U_B_19   | HOH_B_33   | 422d | 0.43 |
| U_B_19   | HOH_B_59   | 3cgp | 0.74 |
| U_B_2    | HOH_A_652  | 4j7l | 0.32 |
| U_B_2    | HOH_B_12   | 3nmr | 0.81 |
| U_B_2    | HOH_B_12   | 3nna | 0.82 |
| U_B_2    | HOH_B_8    | 3nnc | 0.90 |
| U_B_20   | HOH_A_79   | 1fuf | 0.82 |
| U_B_20   | HOH_B_108  | 4kxt | 0.81 |
| U_B_2006 | HOH_B_2225 | 4rkv | 0.47 |
| U_B_201  | HOH_B_347  | 4o41 | 0.49 |
| U_B_22   | HOH_B_5000 | 1qbp | NA   |
| U_B_24   | HOH_B_593  | 3nkb | 0.68 |
| U_B_28   | HOH_B_446  | 3egz | 0.26 |
| U_B_30   | HOH_A_258  | 4m4o | 0.79 |
| U_B_30   | HOH_B_226  | 4m4o | 0.53 |
| U_B_309  | HOH_B_1148 | 1et4 | 0.62 |
| U_B_327  | HOH_B_1192 | 1et4 | 0.85 |
| U_B_33   | HOH_B_278  | 4m4o | 0.37 |
| U_B_33   | HOH_B_87   | 3rg5 | 0.50 |
| U_B_34   | HOH_B_141  | 3rg5 | 0.57 |
| U_B_34   | HOH_B_616  | 2zzm | 0.49 |
| U_B_35   | HOH_B_322  | 3d2v | 0.21 |
| U_B_38   | HOH_B_271  | 4n0t | 0.69 |
| U_B_4    | HOH_B_2006 | 2xs7 | 0.98 |
| U_B_4    | HOH_B_2008 | 2xs7 | 0.94 |

|          |            |      |      |
|----------|------------|------|------|
| U_B_4    | HOH_B_2029 | 2xs2 | 0.92 |
| U_B_41   | HOH_B_176  | 3d2v | 0.03 |
| U_B_5    | HOH_A_1444 | 3pey | 0.76 |
| U_B_5    | HOH_A_306  | 1g2e | 0.86 |
| U_B_5    | HOH_B_1088 | 2atw | 0.39 |
| U_B_5    | HOH_B_26   | 1fxl | 0.70 |
| U_B_502  | HOH_B_703  | 4jk0 | 0.69 |
| U_B_6    | HOH_B_218  | 4mce | 0.65 |
| U_B_6210 | HOH_A_6205 | 3b31 | 0.11 |
| U_B_6210 | HOH_B_6242 | 3b31 | 0.26 |
| U_B_6212 | HOH_B_6227 | 3b31 | 0.05 |
| U_B_7    | HOH_A_1022 | 3i5y | 0.43 |
| U_B_7    | HOH_A_637  | 3qgc | 0.72 |
| U_B_7    | HOH_B_2024 | 2xs2 | 0.82 |
| U_B_72   | HOH_A_2055 | 4aq7 | 0.52 |
| U_B_8    | HOH_B_133  | 1qf6 | 0.07 |
| U_B_8    | HOH_B_202  | 4kyy | 0.37 |
| U_B_80   | HOH_B_30   | 1feu | 0.43 |
| U_B_80   | HOH_B_3126 | 4qcn | NA   |
| U_B_9    | HOH_B_1050 | 2asb | 0.78 |
| U_B_9    | HOH_B_1120 | 2atw | 0.58 |
| U_B_9    | HOH_B_155  | 3rg5 | 0.78 |
| U_B_9    | HOH_B_157  | 3rg5 | 0.59 |
| U_C_1    | HOH_C_203  | 4rge | 0.90 |
| U_C_11   | HOH_D_137  | 4qik | 0.73 |
| U_C_12   | HOH_C_1096 | 2qwy | 0.01 |
| U_C_12   | HOH_C_31   | 2qux | 0.65 |
| U_C_14   | HOH_E_157  | 2qux | 0.41 |
| U_C_2    | HOH_C_214  | 4jah | 0.8  |
| U_C_2    | HOH_C_243  | 4mdx | 0.85 |
| U_C_2    | HOH_C_70   | 3bsb | 0.32 |
| U_C_205  | HOH_C_1610 | 2g3s | 0.49 |
| U_C_3    | HOH_C_2010 | 2xs5 | 0.93 |
| U_C_3    | HOH_C_85   | 3mdi | 0.86 |
| U_C_30   | HOH_C_176  | 280d | 0.39 |
| U_C_37   | HOH_C_3004 | 1qbp | NA   |
| U_C_4    | HOH_C_105  | 3mdg | 0.64 |
| U_C_409  | HOH_A_407  | 1r3e | 0.86 |
| U_C_409  | HOH_C_1289 | 1et4 | 0.61 |
| U_C_427  | HOH_C_1264 | 1et4 | 0.82 |
| U_C_5    | HOH_A_53   | 3fht | 0.61 |
| U_C_5    | HOH_C_36   | 3q0p | 0.75 |
| U_C_5    | HOH_C_37   | 3oin | 0.75 |
| U_C_9    | HOH_B_537  | 1zh5 | 0.89 |
| U_D_1    | HOH_A_2293 | 4d25 | 0.53 |
| U_D_1    | HOH_D_121  | 3boy | 0.50 |

|          |            |      |      |
|----------|------------|------|------|
| U_D_10   | HOH_D_108  | 4jah | 0.79 |
| U_D_108  | HOH_D_1113 | 2q1o | 0.70 |
| U_D_15   | HOH_D_274  | 3boy | 0.16 |
| U_D_1522 | HOH_D_625  | 3ftf | 0.13 |
| U_D_17   | HOH_D_241  | 4oog | 0.35 |
| U_D_2    | HOH_D_121  | 3boy | 0.50 |
| U_D_21   | HOH_D_217  | 4oog | 0.17 |
| U_D_3    | HOH_D_119  | 4qm6 | 0.67 |
| U_D_3    | HOH_D_2007 | 2xs5 | 0.89 |
| U_D_32   | HOH_D_318  | 1jzv | 0.74 |
| U_D_4    | HOH_D_121  | 2awe | 0.67 |
| U_D_4    | HOH_D_171  | 2awe | 0.36 |
| U_D_42   | HOH_D_81   | 280d | 0.62 |
| U_D_5    | HOH_B_519  | 3fht | 0.67 |
| U_D_5    | HOH_D_1030 | 3snp | 0.14 |
| U_D_509  | HOH_D_1198 | 1et4 | 0.47 |
| U_D_52   | HOH_D_3005 | 1qbp | NA   |
| U_D_527  | HOH_D_1193 | 1et4 | 0.81 |
| U_D_6    | HOH_D_323  | 2grb | 0.68 |
| U_D_8    | HOH_D_230  | 3boy | 0.21 |
| U_D_9    | HOH_B_130  | 3bsx | 0.11 |
| U_D_9    | HOH_D_205  | 4e48 | 0.60 |
| U_E_109  | HOH_E_1587 | 1et4 | 0.60 |
| U_E_1209 | HOH_A_2019 | 2i82 | 0.84 |
| U_E_127  | HOH_E_1200 | 1et4 | 0.99 |
| U_E_2    | HOH_E_117  | 4jah | 0.49 |
| U_E_210  | HOH_E_940  | 1sds | 0.65 |
| U_E_25   | HOH_E_104  | 4j1g | 0.84 |
| U_E_2596 | HOH_E_2778 | 4lgt | 0.57 |
| U_E_27   | HOH_E_2048 | 4c7o | 0.20 |
| U_E_32   | HOH_E_533  | 3hax | 0.73 |
| U_E_4    | HOH_E_119  | 4jah | 0.61 |
| U_E_4    | HOH_E_75   | 2awe | 0.60 |
| U_E_409  | HOH_E_60   | 1r3e | NA   |
| U_E_47   | HOH_E_130  | 3eph | 0.41 |
| U_E_6    | HOH_E_684  | 2db3 | 0.70 |
| U_E_8    | HOH_E_28   | 3nnh | 0.58 |
| U_E_80   | HOH_E_337  | 1feu | 0.64 |
| U_F_10   | HOH_F_115  | 4jah | 0.61 |
| U_F_12   | HOH_F_26   | 2qux | 0.59 |
| U_F_210  | HOH_F_928  | 1sds | 0.76 |
| U_F_37   | HOH_F_106  | 4m6d | 0.47 |
| U_F_4    | HOH_G_41   | 2awe | 0.62 |
| U_F_46   | HOH_F_88   | 3rw6 | 0.45 |
| U_F_5    | HOH_F_1296 | 2db3 | 0.50 |
| U_F_51   | HOH_F_83   | 3eph | 0.84 |



|                                 |            |      |      |
|---------------------------------|------------|------|------|
| U_F_6                           | HOH_A_501  | 3hax | 0.88 |
| U_F_6                           | HOH_B_2912 | 2db3 | 0.81 |
| U_G_405                         | HOH_G_66   | 2g3s | 0.98 |
| U_G_5                           | HOH_G_1003 | 2db3 | 0.56 |
| U_G_6                           | HOH_C_2961 | 2db3 | 0.71 |
| U_H_38                          | HOH_H_101  | 3rw6 | 0.36 |
| U_H_4                           | HOH_H_145  | 2awe | 0.27 |
| U_H_413                         | HOH_H_438  | 2g3s | 0.73 |
| U_H_5                           | HOH_H_928  | 2db3 | 0.79 |
| U_I_505                         | HOH_I_556  | 2g3s | 0.52 |
| U_I_8                           | HOH_B_2285 | 1h38 | NA   |
| U_J_1                           | HOH_J_9    | 3t5q | 0.96 |
| U_J_37                          | HOH_J_105  | 4m6d | 0.38 |
| U_J_513                         | HOH_J_522  | 2g3s | 0.85 |
| U_K_3                           | HOH_K_362  | 3rer | 0.65 |
| U_N_80                          | HOH_N_511  | 1dfu | 0.78 |
| U_O_8                           | HOH_O_2006 | 1h38 | NA   |
| U_P_10                          | HOH_P_149  | 1b7f | NA   |
| U_P_7                           | HOH_P_44   | 1urn | 0.53 |
| U_Q_15                          | HOH_Q_2019 | 2bgg | 0.32 |
| U_Q_16                          | HOH_Q_2018 | 2bgg | 0.52 |
| U_Q_38                          | HOH_Q_79   | 2oiu | 0.71 |
| U_Q_7                           | HOH_Q_121  | 1urn | 0.63 |
| U_Q_8                           | HOH_Q_141  | 1urn | 0.47 |
| U_R_1                           | HOH_H_422  | 1m8v | 0.47 |
| U_R_12                          | HOH_B_839  | 4wrt | 0.52 |
| U_R_17C                         | HOH_R_9050 | 2nz4 | 0.59 |
| U_R_6                           | HOH_R_108  | 4krf | 0.51 |
| U_S_105                         | HOH_S_9032 | 2nz4 | 0.84 |
| U_S_7                           | HOH_S_14   | 3r2d | 0.68 |
| U_T_20                          | HOH_T_1272 | 1qu2 | 0.95 |
| U_T_20                          | HOH_T_1281 | 1qu2 | 0.73 |
| U_U_12                          | HOH_U_218  | 3ts2 | 0.77 |
| U_U_7                           | HOH_U_216  | 3ts2 | 0.49 |
| U_W_149                         | HOH_W_2069 | 1gtf | 0.34 |
| U_X_23                          | HOH_X_313  | 2qbz | 0.50 |
| U_X_25                          | HOH_X_427  | 2gdi | 0.78 |
| U_X_28                          | HOH_X_352  | 2gdi | 0.47 |
| U_X_34                          | HOH_X_305  | 4tzc | 0.07 |
| U_X_49                          | HOH_X_243  | 4tzc | 0.62 |
| U_X_49                          | HOH_X_253  | 1y26 | 0.66 |
| U_X_52                          | HOH_X_206  | 2gdi | 0.46 |
| U_Y_25                          | HOH_Y_259  | 2gdi | 0.44 |
| Guanine-Water Stacking Contacts |            |      |      |
| G_0_1002                        | HOH_0_9141 | 1s72 | 0.44 |
| G_0_1175                        | HOH_0_5242 | 1s72 | 0.03 |

|          |            |      |      |
|----------|------------|------|------|
| G_0_1190 | HOH_0_7173 | 1s72 | 0.28 |
| G_0_1216 | HOH_0_8786 | 1s72 | 0.59 |
| G_0_1239 | HOH_0_9920 | 1s72 | 0.27 |
| G_0_1376 | HOH_0_4008 | 1s72 | 0.56 |
| G_0_1438 | HOH_0_4204 | 1s72 | 0.55 |
| G_0_1475 | HOH_0_4666 | 1s72 | 0.46 |
| G_0_1484 | HOH_0_8618 | 1s72 | 0.31 |
| G_0_150  | HOH_0_5434 | 1s72 | 0.47 |
| G_0_1614 | HOH_0_4128 | 1s72 | 0.28 |
| G_0_1703 | HOH_0_5264 | 1s72 | 0.23 |
| G_0_1723 | HOH_0_6887 | 1s72 | 0.80 |
| G_0_175  | HOH_0_4038 | 1s72 | 0.43 |
| G_0_175  | HOH_0_9248 | 1s72 | 0.65 |
| G_0_1752 | HOH_0_5575 | 1s72 | 0.66 |
| G_0_1752 | HOH_0_7037 | 1s72 | 0.45 |
| G_0_1837 | HOH_0_5867 | 1s72 | 0.50 |
| G_0_1868 | HOH_0_4471 | 1s72 | 0.40 |
| G_0_1873 | HOH_0_4707 | 1s72 | 0.01 |
| G_0_1979 | HOH_0_8790 | 1s72 | 0.42 |
| G_0_2013 | HOH_0_4913 | 1s72 | 0.48 |
| G_0_2046 | HOH_0_9715 | 1s72 | 0.38 |
| G_0_2072 | HOH_0_9849 | 1s72 | 0.27 |
| G_0_2075 | HOH_0_9852 | 1s72 | 0.31 |
| G_0_2136 | HOH_0_9877 | 1s72 | 0.69 |
| G_0_219  | HOH_3_8566 | 1s72 | 0.81 |
| G_0_2270 | HOH_0_8789 | 1s72 | 0.62 |
| G_0_2344 | HOH_0_4419 | 1s72 | 0.92 |
| G_0_2421 | HOH_0_4095 | 1s72 | 0.60 |
| G_0_2428 | HOH_0_3288 | 1s72 | 0.29 |
| G_0_2442 | HOH_0_8703 | 1s72 | 0.85 |
| G_0_2459 | HOH_0_4312 | 1s72 | 0.84 |
| G_0_2516 | HOH_0_4936 | 1s72 | 0.07 |
| G_0_2525 | HOH_0_3548 | 1s72 | 0.44 |
| G_0_2570 | HOH_0_4335 | 1s72 | 0.04 |
| G_0_2611 | HOH_0_8757 | 1s72 | 0.68 |
| G_0_2611 | HOH_0_9265 | 1s72 | 0.62 |
| G_0_2617 | HOH_0_5201 | 1s72 | 0.35 |
| G_0_264  | HOH_0_6748 | 1s72 | 0.11 |
| G_0_2643 | HOH_0_5292 | 1s72 | 0.49 |
| G_0_2643 | HOH_0_6544 | 1s72 | 0.33 |
| G_0_2882 | HOH_0_6443 | 1s72 | 0.58 |
| G_0_301  | HOH_0_5339 | 1s72 | 0.48 |
| G_0_304  | HOH_0_9871 | 1s72 | 0.16 |
| G_0_381  | HOH_0_5186 | 1s72 | 0.18 |
| G_0_553  | HOH_0_3580 | 1s72 | 0.21 |
| G_0_588  | HOH_0_5317 | 1s72 | 0.02 |

|          |            |      |      |
|----------|------------|------|------|
| G_0_702  | HOH_0_9001 | 1s72 | 0.55 |
| G_0_775  | HOH_0_3941 | 1s72 | 0.55 |
| G_0_869  | HOH_0_3187 | 1s72 | 0.64 |
| G_0_901  | HOH_0_8636 | 1s72 | 0.69 |
| G_A_1    | HOH_A_390  | 1qcu | 0.06 |
| G_A_1    | HOH_A_56   | 1fuf | 0.62 |
| G_A_10   | HOH_A_378  | 1q96 | 0.73 |
| G_A_108  | HOH_C_799  | 3p4b | 0.70 |
| G_A_11   | HOH_A_105  | 3sj2 | 0.76 |
| G_A_1271 | HOH_A3417  | 4KJ9 | NA   |
| G_A_13   | HOH_A_131  | 3gx5 | 0.38 |
| G_A_13   | HOH_A_159  | 3td1 | 0.27 |
| G_A_13   | HOH_A_186  | 1f27 | NA   |
| G_A_13   | HOH_A_201  | 1d4r | 0.31 |
| G_A_1312 | HOH_W_4002 | 4qcn | NA   |
| G_A_14   | HOH_A_334  | 2fqn | 0.69 |
| G_A_1423 | HOH_A_4018 | 4qcn | NA   |
| G_A_15   | HOH_B_32   | 3bnl | 0.14 |
| G_A_1502 | HOH_A_4090 | 4qcn | NA   |
| G_A_17   | HOH_A_38   | 1t0e | 0.65 |
| G_A_1728 | HOH_A_5250 | 4qcn | NA   |
| G_A_19   | HOH_A_107  | 3td0 | 0.79 |
| G_A_2    | HOH_A_114  | 1l2x | 0.71 |
| G_A_2    | HOH_A_116  | 1p79 | 0.50 |
| G_A_2    | HOH_A_196  | 3cjz | 0.65 |
| G_A_2    | HOH_A_408  | 1q96 | 0.38 |
| G_A_2045 | HOH_A_5198 | 4qcn | NA   |
| G_A_21   | HOH_A_141  | 397d | 0.79 |
| G_A_2262 | HOH_A_5031 | 4qcn | NA   |
| G_A_2269 | HOH_A3510  | 4KJ9 | NA   |
| G_A_24   | HOH_A_235  | 3d0u | 0.33 |
| G_A_24   | HOH_A_427  | 1nuv | 0.64 |
| G_A_26   | HOH_A_97   | 2zy6 | 0.56 |
| G_A_28   | HOH_A_272  | 3e5c | 0.07 |
| G_A_28   | HOH_A_94   | 2zy6 | 0.33 |
| G_A_2841 | HOH_A_4688 | 4qcn | NA   |
| G_A_29   | HOH_A_113  | 3ivn | 0.75 |
| G_A_295  | HOH_A3229  | 4KJ9 | NA   |
| G_A_3    | HOH_A_107  | 3r1c | 0.93 |
| G_A_3    | HOH_A_182  | 3td0 | 0.76 |
| G_A_3    | HOH_A_210  | 1j9h | NA   |
| G_A_31   | HOH_A_256  | 3e5c | 0.15 |
| G_A_31   | HOH_A_259  | 3e5c | 0.17 |
| G_A_32   | HOH_A_281  | 3la5 | 0.80 |
| G_A_33   | HOH_A_2066 | 4un3 | 0.86 |
| G_A_36   | HOH_A_2179 | 3zp8 | 0.49 |

|         |            |      |      |
|---------|------------|------|------|
| G_A_36  | HOH_A_2180 | 3zp8 | 0.91 |
| G_A_37  | HOH_A_297  | 4lvz | 0.75 |
| G_A_38  | HOH_A_314  | 3la5 | 0.69 |
| G_A_38  | HOH_A_458  | 3fo4 | 0.44 |
| G_A_4   | HOH_A_102  | 3sj2 | 0.90 |
| G_A_4   | HOH_A_2026 | 2v6w | 0.70 |
| G_A_4   | HOH_A_41   | 3gvn | 0.90 |
| G_A_4   | HOH_A_498  | 4lvz | 0.78 |
| G_A_44  | HOH_A_126  | 3la5 | 0.85 |
| G_A_46  | HOH_A_93   | 1csl | 0.73 |
| G_A_47  | HOH_A_221  | 4oji | 0.29 |
| G_A_5   | HOH_A_1153 | 2qwy | 0.10 |
| G_A_5   | HOH_A_19   | 3cgp | 0.98 |
| G_A_51  | HOH_A_9    | 3p59 | 0.83 |
| G_A_54  | HOH_A_321  | 4lvz | 0.81 |
| G_A_584 | HOH_A_4759 | 4qcn | NA   |
| G_A_6   | HOH_A_486  | 3r1c | 0.66 |
| G_A_6   | HOH_A_506  | 2a43 | 0.94 |
| G_A_6   | HOH_A_51   | 420d | NA   |
| G_A_6   | HOH_A_85   | 3r1d | 0.67 |
| G_A_60  | HOH_A_145  | 3d2v | 0.70 |
| G_A_62  | HOH_A_483  | 3fo4 | 0.64 |
| G_A_7   | HOH_A_221  | 1xpe | NA   |
| G_A_7   | HOH_A_241  | 1nlc | 0.09 |
| G_A_72  | HOH_A_358  | 354d | NA   |
| G_A_72  | HOH_A_402  | 3fo4 | 0.78 |
| G_A_72  | HOH_A_701  | 4lx6 | 0.67 |
| G_A_72  | HOH_B_339  | 354d | NA   |
| G_A_721 | HOH_A_4044 | 4QCN | NA   |
| G_A_75  | HOH_A_329  | 354d | NA   |
| G_A_76  | HOH_A_339  | 4wfl | 0.41 |
| G_A_77  | HOH_A_213  | 3d0u | 0.24 |
| G_A_786 | HOH_A_5320 | 4qcn | NA   |
| G_A_8   | HOH_A_131  | 3sj2 | 0.61 |
| G_A_8   | HOH_A_26   | 255d | NA   |
| G_A_855 | HOH_A_4044 | 4qcn | NA   |
| G_A_9   | HOH_A_26   | 3r1d | 0.78 |
| G_A_9   | HOH_A_301  | 4qlm | 0.19 |
| G_B_1   | HOH_B_34   | 2dr8 | 0.53 |
| G_B_10  | HOH_B_2001 | 2bte | 0.77 |
| G_B_10  | HOH_B_802  | 1qrs | 0.58 |
| G_B_102 | HOH_B_313  | 2ho7 | 0.26 |
| G_B_11  | HOH_B_1207 | 2asb | 0.40 |
| G_B_11  | HOH_B_233  | 2hw8 | 0.58 |
| G_B_12  | HOH_B_113  | 1d4r | 0.91 |
| G_B_12  | HOH_B_118  | 1d4r | 0.56 |

|          |            |      |      |
|----------|------------|------|------|
| G_B_12   | HOH_B_205  | 1j9h | NA   |
| G_B_13   | HOH_B_102  | 1dqh | 0.45 |
| G_B_135  | HOH_B_425  | 1jid | 0.24 |
| G_B_138  | HOH_B_376  | 1jid | 0.60 |
| G_B_14   | HOH_B_175  | 3sj2 | 0.58 |
| G_B_15   | HOH_A_31   | 3bnl | 0.24 |
| G_B_1530 | HOH_A_614  | 3r9w | 0.20 |
| G_B_16   | HOH_B_50   | 479d | 0.40 |
| G_B_166  | HOH_B_440  | 1lng | NA   |
| G_B_167  | HOH_B_424  | 1lng | NA   |
| G_B_17   | HOH_B_111  | 1dqh | 0.76 |
| G_B_17   | HOH_B_42   | 3ibk | 0.34 |
| G_B_17   | HOH_D_7327 | 1qbp | NA   |
| G_B_177  | HOH_B_2    | 1l9a | NA   |
| G_B_2    | HOH_A_70   | 3q0r | 0.78 |
| G_B_2    | HOH_B_101  | 3qgc | 0.79 |
| G_B_2    | HOH_B_133  | 3k5y | 0.46 |
| G_B_2    | HOH_B_179  | 3k64 | 0.80 |
| G_B_2    | HOH_B_208  | 3k62 | 0.74 |
| G_B_2    | HOH_B_2104 | 2vpl | 0.56 |
| G_B_2    | HOH_B_213  | 3k5z | 0.35 |
| G_B_2    | HOH_B_274  | 3k5q | 0.46 |
| G_B_2    | HOH_B_275  | 3k61 | 0.37 |
| G_B_20   | HOH_B_58   | 2r22 | 0.78 |
| G_B_20   | HOH_B_62   | 2r20 | 0.76 |
| G_B_202  | HOH_B_358  | 4o41 | 0.36 |
| G_B_21   | HOH_B_57   | 353d | NA   |
| G_B_21   | HOH_B_71   | 1mzp | 0.31 |
| G_B_2125 | HOH_B_2314 | 3umy | 0.64 |
| G_B_24   | HOH_B_2079 | 2y8w | 0.67 |
| G_B_24   | HOH_B_260  | 3d2v | 0.31 |
| G_B_24   | HOH_B_63   | 1t0d | 0.51 |
| G_B_27   | HOH_A_217  | 4e48 | 0.56 |
| G_B_28   | HOH_A_317  | 4m4o | 0.59 |
| G_B_4    | HOH_B_116  | 4kq0 | 0.28 |
| G_B_412  | HOH_A_575  | 1k8w | 0.88 |
| G_B_42   | HOH_B_303  | 2fqn | 0.90 |
| G_B_5    | HOH_A_158  | 3q0r | 0.55 |
| G_B_5    | HOH_B_102  | 3v74 | 0.97 |
| G_B_5    | HOH_B_2013 | 2val | 0.35 |
| G_B_503  | HOH_B_207  | 1j1u | 0.77 |
| G_B_513  | HOH_B_719  | 4jk0 | 0.31 |
| G_B_54   | HOH_B_242  | 4m4o | 0.57 |
| G_B_55   | HOH_A_1082 | 4n0t | 0.74 |
| G_B_55   | HOH_B_220  | 4n0t | 0.93 |
| G_B_599  | HOH_A_561  | 3ol8 | 0.65 |

|         |            |      |      |
|---------|------------|------|------|
| G_B_6   | HOH_B_164  | 3r1c | 0.70 |
| G_B_6   | HOH_B_21   | 3r1d | 0.99 |
| G_B_60  | HOH_B_109  | 3d2v | 0.80 |
| G_B_63  | HOH_B_564  | 3nkb | 0.80 |
| G_B_67  | HOH_B_3103 | 4qcn | NA   |
| G_B_72  | HOH_B_3117 | 4qcn | NA   |
| G_B_72  | HOH_C_351  | 1feu | 0.78 |
| G_B_75  | HOH_B_196  | 1feu | 0.68 |
| G_B_8   | HOH_B_39   | 3sj2 | 0.87 |
| G_B_9   | HOH_B_1047 | 466d | 0.58 |
| G_B_9   | HOH_B_119  | 4u35 | 0.74 |
| G_B_9   | HOH_B_66   | 3r1d | 0.54 |
| G_B_901 | HOH_B_1176 | 2zuf | 0.81 |
| G_B_96  | HOH_B_391  | 4n0t | 0.31 |
| G_B_98  | HOH_A_390  | 354d | NA   |
| G_C_1   | HOH_A_440  | 3ova | 0.89 |
| G_C_1   | HOH_C_35   | 3nj7 | 0.67 |
| G_C_10  | HOH_A_188  | 1jbr | 0.41 |
| G_C_10  | HOH_C_379  | 1q96 | 0.71 |
| G_C_10  | HOH_C_382  | 1q96 | 0.72 |
| G_C_12  | HOH_C_159  | 1d4r | 0.43 |
| G_C_12  | HOH_C_49   | 2ez6 | 0.64 |
| G_C_13  | HOH_C_143  | 1d4r | 0.55 |
| G_C_14  | HOH_C_243  | 1t0e | 0.82 |
| G_C_14  | HOH_E_102  | 1m8w | 0.52 |
| G_C_16  | HOH_C_117  | 3qrp | 0.77 |
| G_C_16  | HOH_E_181  | 2qux | 0.57 |
| G_C_21  | HOH_C_156  | 1j9h | NA   |
| G_C_22  | HOH_C_441  | 1ooa | NA   |
| G_C_25  | HOH_C_2007 | 4c8z | 0.48 |
| G_C_25  | HOH_C_2015 | 4c8y | 0.74 |
| G_C_26  | HOH_A_2093 | 4c8y | 0.91 |
| G_C_3   | HOH_A_3179 | 1wpu | 0.46 |
| G_C_3   | HOH_C_328  | 1wpu | 0.58 |
| G_C_412 | HOH_A_395  | 1r3e | 0.68 |
| G_C_412 | HOH_C_2    | 1r3e | 0.96 |
| G_C_426 | HOH_C_1188 | 1et4 | 0.48 |
| G_C_45  | HOH_C_2046 | 1efw | 0.42 |
| G_C_5   | HOH_A_3012 | 1wmq | 0.79 |
| G_C_5   | HOH_C_2018 | 2xsl | 0.89 |
| G_C_693 | HOH_C_786  | 3ol9 | 0.03 |
| G_C_7   | HOH_D_86   | 1t0d | 0.73 |
| G_C_9   | HOH_C_94   | 3r1d | 0.84 |
| G_C_916 | HOH_A_496  | 3kmq | 0.68 |
| G_C_98  | HOH_B_10   | 1feu | 0.72 |
| G_D_1   | HOH_D_204  | 4n48 | 0.60 |

|          |            |       |      |
|----------|------------|-------|------|
| G_D_1    | HOH_D_43   | 3nj7  | 0.76 |
| G_D_10   | HOH_D_427  | 1jbs  | 0.82 |
| G_D_110  | HOH_D_120  | 2pn4  | 0.83 |
| G_D_14   | HOH_D_207  | 4oog  | 0.40 |
| G_D_19   | HOH_D_44   | 3boy  | 1.01 |
| G_D_1934 | HOH_B_2299 | 1il2  | 0.66 |
| G_D_2    | HOH_D_111  | 3q0o  | 0.24 |
| G_D_2    | HOH_D_2003 | 4afy  | 0.75 |
| G_D_2    | HOH_D_317  | 2grb  | 0.73 |
| G_D_20   | HOH_D_113  | 4qik  | 0.37 |
| G_D_201  | HOH_D_409  | 1yls  | 0.09 |
| G_D_208  | HOH_A_916  | 1sds  | 0.86 |
| G_D_22   | HOH_D_231  | 4oog  | 0.29 |
| G_D_24   | HOH_D_50   | 1t0d  | 0.49 |
| G_D_3    | HOH_B_3145 | 1wpu  | 0.77 |
| G_D_3    | HOH_D_181  | 1wpu  | 0.07 |
| G_D_3    | HOH_D_203  | 3r1c  | 0.87 |
| G_D_30   | HOH_D_142  | 1j9h  | NA   |
| G_D_36   | HOH_B_2055 | 2vpl  | 0.54 |
| G_D_4    | HOH_C_53   | 3glp  | 0.70 |
| G_D_408  | HOH_D_120  | 1r3e  | 0.46 |
| G_D_47   | HOH_B_4009 | 1qbp  | NA   |
| G_D_5    | HOH_B_3005 | 1wpu  | 0.98 |
| G_D_5    | HOH_D_42   | 3boy  | 0.93 |
| G_D_501  | HOH_D_1472 | 1et4  | 0.47 |
| G_D_8    | HOH_D_1059 | 435d  | 0.78 |
| G_D_9    | HOH_D_126  | 3r1d  | 0.53 |
| G_E_1    | HOH_A_1463 | 4g0a  | 0.86 |
| G_E_1    | HOH_B_1717 | 1tfw  | 0.68 |
| G_E_1    | HOH_E_82   | 3nj7  | 0.52 |
| G_E_1    | HOH_E_83   | 2hvy  | 0.71 |
| G_E_12   | HOH_E_78   | 2hvy  | 0.51 |
| G_E_19   | HOH_E_164  | 1nuv  | 0.78 |
| G_E_208  | HOH_B_923  | 1sds  | 0.98 |
| G_E_2588 | HOH_E_2731 | 4lgt  | 1.04 |
| G_E_3    | HOH_E_445  | 3r1c  | 0.64 |
| G_E_302  | HOH_F_361  | 2g3s  | 0.54 |
| G_E_4    | HOH_E_102  | 1m8w  | 0.52 |
| G_E_4    | HOH_E_118  | 4kq0  | 0.33 |
| G_E_72   | HOH_F_341  | 1feu  | 0.86 |
| G_E_9    | HOH_A_338  | 3hjwt | 0.81 |
| G_E_9    | HOH_E_212  | 3r1d  | 0.57 |
| G_F_14   | HOH_F_63   | 3rw6  | 0.47 |
| G_F_18   | HOH_F_109  | 3rw6  | 0.57 |
| G_F_208  | HOH_C_883  | 1sds  | 0.91 |
| G_F_211  | HOH_C_866  | 1sds  | 0.90 |

|          |            |      |      |
|----------|------------|------|------|
| G_F_24   | HOH_F_40   | 1zx7 | 0.75 |
| G_F_32   | HOH_F_61   | 2ozb | 0.41 |
| G_F_35   | HOH_F_123  | 3rw6 | 0.16 |
| G_F_47   | HOH_F_69   | 3rw6 | 0.35 |
| G_F_599  | HOH_E_524  | 3ol8 | 0.69 |
| G_F_9    | HOH_B_140  | 1m8w | 0.51 |
| G_G_2    | HOH_A_529  | 1tfw | 0.65 |
| G_G_24   | HOH_G_237  | 1nuv | 0.60 |
| G_G_4    | HOH_G_2001 | 4bwm | 0.80 |
| G_G_6    | HOH_G_450  | 3r1c | 0.90 |
| G_H_1    | HOH_H_1847 | 2o5i | 1.0  |
| G_H_14   | HOH_H_72   | 3rw6 | 0.33 |
| G_H_1510 | HOH_H_2071 | 2i82 | 0.75 |
| G_H_18   | HOH_H_68   | 3rw6 | 0.49 |
| G_H_9    | HOH_B_2015 | 1yvp | 0.71 |
| G_H_9    | HOH_P_181  | 3ok4 | 0.81 |
| G_I_3    | HOH_I_453  | 3r1c | 0.70 |
| G_I_6    | HOH_I_427  | 3r1c | 0.89 |
| G_J_3    | HOH_J_154  | 3r1c | 0.93 |
| G_J_599  | HOH_I_521  | 3ol8 | 0.81 |
| G_J_6    | HOH_J_113  | 3r1c | 0.82 |
| G_J_7    | HOH_J_104  | 4gha | 0.66 |
| G_K_3    | HOH_K_431  | 3r1c | 0.93 |
| G_K_6    | HOH_K_433  | 3r1c | 0.84 |
| G_K_693  | HOH_K_1234 | 3ol9 | 0.11 |
| G_L_3    | HOH_L_176  | 3r1c | 0.83 |
| G_L_6    | HOH_L_155  | 3r1c | 0.82 |
| G_M_3    | HOH_M_139  | 3r1c | 0.92 |
| G_M_6    | HOH_M_390  | 3r1c | 0.66 |
| G_M_98   | HOH_M_537  | 1dfu | 0.55 |
| G_M_98   | HOH_N_508  | 1dfu | 0.64 |
| G_N_599  | HOH_M_515  | 3ol8 | 0.77 |
| G_N_72   | HOH_M_507  | 1dfu | 0.27 |
| G_N_72   | HOH_M_527  | 1dfu | 0.73 |
| G_N_75   | HOH_P_100  | 1dfu | 0.87 |
| G_O_1    | HOH_O_2002 | 1h38 | NA   |
| G_O_16   | HOH_O_26   | 2qux | 0.75 |
| G_O_6    | HOH_O_463  | 3r1c | 0.52 |
| G_O_693  | HOH_O_816  | 3ol9 | 0.13 |
| G_O_7    | HOH_O_27   | 2qux | 0.44 |
| G_Q_1    | HOH_Q_89   | 2oiu | 0.41 |
| G_Q_3    | HOH_Q_9    | 3r1c | 0.80 |
| G_Q_6    | HOH_Q_361  | 3r1c | 0.69 |
| G_R_2    | HOH_R_14   | 3r2c | 0.92 |
| G_R_3    | HOH_A_2324 | 1qln | 0.51 |
| G_R_6    | HOH_R_468  | 3r1c | 0.50 |



|                                  |            |      |      |
|----------------------------------|------------|------|------|
| G_S_2                            | HOH_S_151  | 3r2c | 0.93 |
| G_T_6                            | HOH_T_335  | 3r1c | 0.65 |
| G_U_3                            | HOH_U_336  | 3r1c | 0.66 |
| G_U_6                            | HOH_U_69   | 3r1c | 0.80 |
| G_V_21                           | HOH_V_311  | 3ts2 | 0.21 |
| G_V_58                           | HOH_V_158  | 3q3z | 0.05 |
| G_W_106                          | HOH_W_2005 | 1gtf | 0.48 |
| G_W_126                          | HOH_W_2037 | 1gtf | 0.63 |
| G_W_151                          | HOH_W_2072 | 1gtf | 0.65 |
| G_W_6                            | HOH_W_473  | 3r1c | 0.81 |
| G_X_11                           | HOH_X_522  | 3czw | 0.12 |
| G_X_164                          | HOH_X_382  | 2qbz | 0.63 |
| G_X_168                          | HOH_X_368  | 2qbz | 0.19 |
| G_X_29                           | HOH_X_223  | 2gdi | 0.20 |
| G_X_72                           | HOH_X_201  | 2gdi | 0.47 |
| G_X_72                           | HOH_X_365  | 2gdi | 0.79 |
| G_X_73                           | HOH_X_315  | 2qbz | 0.62 |
| G_X_78                           | HOH_X_384  | 2gdi | 0.76 |
| G_X_8                            | HOH_X_537  | 3czw | 0.37 |
| G_Y_29                           | HOH_Y_347  | 2gdi | 0.28 |
| G_b_6                            | HOH_b_367  | 3r1c | 0.53 |
| G_d_3                            | HOH_d_355  | 3r1c | 0.75 |
| G_e_3                            | HOH_e_411  | 3r1c | 0.45 |
| G_e_6                            | HOH_e_479  | 3r1c | 0.69 |
| G_g_3                            | HOH_g_412  | 3r1c | 0.64 |
| G_j_6                            | HOH_j_386  | 3r1c | 0.60 |
| Cytosine-Water Stacking Contacts |            |      |      |
| C_0_1043                         | HOH_0_9699 | 1s72 | 0.44 |
| C_0_1083                         | HOH_0_8565 | 1s72 | 0.88 |
| C_0_1184                         | HOH_0_5744 | 1s72 | 0.39 |
| C_0_1353                         | HOH_0_3118 | 1s72 | 0.51 |
| C_0_1365                         | HOH_0_9967 | 1s72 | 0.51 |
| C_0_1602                         | HOH_0_4496 | 1s72 | 0.52 |
| C_0_1708                         | HOH_0_4214 | 1s72 | 0.55 |
| C_0_1708                         | HOH_P_162  | 1s72 | 0.52 |
| C_0_1753                         | HOH_0_3604 | 1s72 | 0.15 |
| C_0_1772                         | HOH_0_4776 | 1s72 | 0.53 |
| C_0_1864                         | HOH_0_4162 | 1s72 | 0.72 |
| C_0_1872                         | HOH_0_6799 | 1s72 | 0.48 |
| C_0_2360                         | HOH_0_6163 | 1s72 | 0.16 |
| C_0_2427                         | HOH_0_8777 | 1s72 | 0.40 |
| C_0_2450                         | HOH_0_4676 | 1s72 | 0.34 |
| C_0_2508                         | HOH_0_6222 | 1s72 | 0.41 |
| C_0_2526                         | HOH_0_6452 | 1s72 | 0.31 |
| C_0_2526                         | HOH_0_7097 | 1s72 | 0.30 |
| C_0_2737                         | HOH_0_5643 | 1s72 | 0.25 |

|          |            |      |      |
|----------|------------|------|------|
| C_0_282  | HOH_0_9864 | 1s72 | 0.75 |
| C_0_2833 | HOH_0_6615 | 1s72 | 0.15 |
| C_0_2839 | HOH_0_5231 | 1s72 | 0.53 |
| C_0_284  | HOH_0_9126 | 1s72 | 0.39 |
| C_0_2895 | HOH_0_9077 | 1s72 | 0.62 |
| C_0_31   | HOH_0_5634 | 1s72 | 0.52 |
| C_0_31   | HOH_T_5160 | 1s72 | 0.42 |
| C_0_376  | HOH_0_9815 | 1s72 | 0.14 |
| C_0_438  | HOH_0_9934 | 1s72 | 0.53 |
| C_0_687  | HOH_0_6695 | 1s72 | 0.59 |
| C_0_770  | HOH_0_3530 | 1s72 | 0.46 |
| C_0_789  | HOH_0_4509 | 1s72 | 0.58 |
| C_0_899  | HOH_0_4310 | 1s72 | 0.54 |
| C_0_905  | HOH_0_4683 | 1s72 | 0.57 |
| C_9_122  | HOH_9_8423 | 1s72 | 0.40 |
| C_A_10   | HOH_A_103  | 4e6b | 0.76 |
| C_A_101  | HOH_A_508  | 402d | 0.15 |
| C_A_11   | HOH_A_228  | 4e48 | 0.35 |
| C_A_12   | HOH_A_33   | 1t0d | 0.69 |
| C_A_12   | HOH_A_53   | 1t0e | 0.57 |
| C_A_15   | HOH_A_57   | 3bnt | 0.30 |
| C_A_15   | HOH_B_54   | 3mei | 0.61 |
| C_A_1677 | HOH_A_4923 | 4qcn | NA   |
| C_A_1710 | HOH_A_4489 | 4qcn | NA   |
| C_A_2    | HOH_A_132  | 3glp | 0.66 |
| C_A_2    | HOH_A_44   | 3cgr | 0.78 |
| C_A_20   | HOH_A_118  | 1nlc | 0.88 |
| C_A_20   | HOH_A_242  | 4oji | 0.52 |
| C_A_21   | HOH_A_190  | 3td1 | 0.45 |
| C_A_23   | HOH_D_223  | 3bnq | 0.68 |
| C_A_2443 | HOH_A3497  | 4KJ9 | NA   |
| C_A_28   | HOH_A_382  | 3fo4 | 0.80 |
| C_A_34   | HOH_A_119  | 3gx5 | 0.58 |
| C_A_39   | HOH_A_427  | 3fo4 | 0.41 |
| C_A_4    | HOH_A_53   | 1kd5 | 0.90 |
| C_A_44   | HOH_A_151  | 3ivn | 0.78 |
| C_A_46   | HOH_A_346  | 4lvz | 0.59 |
| C_A_47   | HOH_A_347  | 3la5 | 0.42 |
| C_A_5    | HOH_A_117  | 3glp | 0.91 |
| C_A_5    | HOH_A_159  | 1j9h | NA   |
| C_A_5    | HOH_A_206  | 4e48 | 0.49 |
| C_A_5    | HOH_A_218  | 4oji | 0.42 |
| C_A_53   | HOH_A_12   | 3la5 | 0.93 |
| C_A_54   | HOH_A_377  | 3la5 | 0.36 |
| C_A_54   | HOH_A_432  | 3la5 | 0.89 |
| C_A_54   | HOH_A_466  | 3fo4 | 0.57 |

|           |            |      |      |
|-----------|------------|------|------|
| C_A_54    | HOH_A_712  | 4lx6 | 0.72 |
| C_A_6     | HOH_A_126  | 4e5c | 0.93 |
| C_A_67    | HOH_A_2141 | 4un3 | 0.48 |
| C_A_67    | HOH_A_2213 | 4un5 | 0.65 |
| C_A_7     | HOH_A_317  | 3bnq | 0.38 |
| C_A_7(+)  | HOH_A_530  | 2a43 | 1.0  |
| C_A_7     | HOH_A_59   | 2ao5 | 0.45 |
| C_A_7     | HOH_A_65   | 3syw | 0.67 |
| C_A_72    | HOH_A_86   | 1u0b | 0.74 |
| C_A_74    | HOH_A_292  | 4p5j | 0.53 |
| C_A_79    | HOH_A_307  | 3dir | 0.24 |
| C_A_8(+)  | HOH_A_71   | 1l2x | 0.98 |
| C_A_99    | HOH_A_1871 | 4KJA | NA   |
| C_B_11    | HOH_A_1181 | 4w5o | 0.82 |
| C_B_11    | HOH_B_2036 | 2y8w | 0.57 |
| C_B_112   | HOH_B_516  | 402d | 0.09 |
| C_B_13    | HOH_B_258  | 1nlc | 0.55 |
| C_B_14    | HOH_B_162  | 1j9h | NA   |
| C_B_15    | HOH_B_47   | 2r22 | 0.73 |
| C_B_15    | HOH_B_49   | 2r20 | 0.91 |
| C_B_16    | HOH_B_104  | 1dqh | 0.69 |
| C_B_17    | HOH_B_60   | 353d | NA   |
| C_B_170   | HOH_B_12   | 1l9a | NA   |
| C_B_19    | HOH_A_217  | 1lnt | 0.90 |
| C_B_201   | HOH_A_396  | 4knq | 0.41 |
| C_B_212   | HOH_B_416  | 4j5v | 0.01 |
| C_B_215   | HOH_B_411  | 4j5v | 0.03 |
| C_B_218   | HOH_B_403  | 1lng | NA   |
| C_B_218   | HOH_B_405  | 4j5v | 0.54 |
| C_B_22    | HOH_B_64   | 3cgs | 0.76 |
| C_B_25    | HOH_B_211  | 4e48 | 0.57 |
| C_B_25    | HOH_B_624  | 3nkb | 0.72 |
| C_B_37    | HOH_B_203  | 4e48 | 0.58 |
| C_B_4     | HOH_B_207  | 3bnq | 0.51 |
| C_B_4     | HOH_B_244  | 4k31 | 0.81 |
| C_B_4     | HOH_B_62   | 1kd5 | 0.63 |
| C_B_41(+) | HOH_B_503  | 3nkb | 0.86 |
| C_B_415   | HOH_A_577  | 1k8w | 0.82 |
| C_B_42    | HOH_A_422  | 3egz | 0.56 |
| C_B_44    | HOH_B_133  | 3ivn | 0.64 |
| C_B_45    | HOH_B_319  | 1m5o | 0.77 |
| C_B_45    | HOH_B_411  | 3egz | 0.52 |
| C_B_5     | HOH_B_206  | 4msr | 0.85 |
| C_B_598   | HOH_A_648  | 4k4y | 0.30 |
| C_B_67    | HOH_A_1408 | 4oo8 | 0.45 |
| C_B_69    | HOH_B_44   | 3gvn | 0.84 |

|           |            |      |      |
|-----------|------------|------|------|
| C_B_7     | HOH_A_312  | 3bnq | 0.70 |
| C_B_7     | HOH_B_59   | 3syw | 0.64 |
| C_B_8     | HOH_R_299  | 3ok4 | 0.85 |
| C_B_934   | HOH_B_1175 | 2zuf | 0.48 |
| C_C_12    | HOH_C_24   | 1zx7 | 0.52 |
| C_C_17    | HOH_C_39   | 1m8y | 0.75 |
| C_C_2     | HOH_C_106  | 4qm6 | 0.95 |
| C_C_23    | HOH_B_227  | 3bnq | 0.53 |
| C_C_23    | HOH_C_121  | 1j9h | NA   |
| C_C_3     | HOH_C_12   | 2ao5 | NA   |
| C_C_4     | HOH_C_267  | 4k31 | 0.81 |
| C_C_8     | HOH_C_167  | 1yz9 | 0.73 |
| C_C_9     | HOH_C_262  | 1t0e | 0.33 |
| C_D_11    | HOH_D_118  | 3og8 | 0.50 |
| C_D_13    | HOH_A_712  | 2i91 | 0.38 |
| C_D_1535  | HOH_D_96   | 3iev | 0.82 |
| C_D_2     | HOH_B_535  | 4o8j | 0.97 |
| C_D_2     | HOH_D_104  | 4qm6 | 1.03 |
| C_D_2     | HOH_D_14   | 3glp | 0.97 |
| C_D_20    | HOH_D_98   | 3vjr | 0.87 |
| C_D_32    | HOH_D_112  | 1j9h | NA   |
| C_D_34    | HOH_D_325  | 1jzv | 0.55 |
| C_D_4     | HOH_D_2007 | 4d25 | 0.59 |
| C_D_5     | HOH_C_325  | 3bnq | 0.60 |
| C_D_5     | HOH_D_12   | 3glp | 1.06 |
| C_D_5     | HOH_D_13   | 3q0o | 0.62 |
| C_D_5     | HOH_D_202  | 4e48 | 0.46 |
| C_E_11    | HOH_E_2013 | 4c7o | 0.47 |
| C_E_303   | HOH_E_319  | 2g3s | 0.72 |
| C_E_55(+) | HOH_F_13   | 3p59 | 0.55 |
| C_E_6     | HOH_A_119  | 1m8w | 0.72 |
| C_F_10    | HOH_F_333  | 1yvp | 0.91 |
| C_F_311   | HOH_F_356  | 2g3s | 0.59 |
| C_F_35    | HOH_F_91   | 3eph | 0.05 |
| C_F_6     | HOH_B_256  | 1m8w | 0.55 |
| C_G_12    | HOH_G_23   | 1zx7 | 0.58 |
| C_G_408   | HOH_J_542  | 2g3s | 0.83 |
| C_G_8     | HOH_A_2008 | 1yvp | 0.68 |
| C_G_8     | HOH_A_2130 | 1yvp | 0.61 |
| C_G_9     | HOH_G_736  | 1tfw | 0.34 |
| C_H_427   | HOH_G_636  | 1duq | NA   |
| C_H_7     | HOH_B_2140 | 1yvp | 0.73 |
| C_H_8     | HOH_B_2021 | 1yvp | 0.73 |
| C_H_8     | HOH_B_2054 | 1yvp | 0.92 |
| C_J_61    | HOH_C_519  | 1tfw | 0.86 |
| C_R_1     | HOH_F_413  | 4u8t | 0.55 |

|         |           |      |      |
|---------|-----------|------|------|
| C_U_20  | HOH_U_210 | 3ts2 | 0.20 |
| C_X_12  | HOH_X_104 | 3wbm | 0.89 |
| C_X_23  | HOH_X_225 | 2gdi | 0.46 |
| C_X_24  | HOH_X_479 | 2gdi | 0.22 |
| C_X_502 | HOH_C_715 | 4pei | 0.71 |
| C_X_53  | HOH_X_235 | 1y26 | 0.52 |
| C_Y_23  | HOH_Y_263 | 2gdi | 0.53 |

**Table S2.** Screening of the environment near the O<sup>W</sup> that is stacking to a nucleobase, in order to classify it as a possible lp- $\pi$  contact (at least 2 acceptor atoms within H-bonding distance from O<sup>W</sup>). **Instances corresponding to Figure S4a[288 instances]**

| PDB ID: | Base    | Water      | Surrounding acceptor atoms near Water     |
|---------|---------|------------|-------------------------------------------|
| 4u34    | A_A_2   | HOH_A_134  | OP2-G_A_3,N7-G_A_3                        |
| 2r20    | A_A_9   | HOH_A_80   | OP2-A_A_10,N7-A_A_10                      |
| 4u35    | A_A_2   | HOH_A_137  | OP2-G_A_3,N7-G_A_3                        |
| 3dd2    | A_B_8   | HOH_B_1009 | OP2-A_B_9,N7-A_B_9                        |
| 2r22    | A_A_9   | HOH_A_71   | OP2-A_A_10,N7-A_A_10                      |
| 2r20    | A_B_22  | HOH_B_106  | OP2-A_B_23,N7-A_B_23                      |
| 3p59    | A_D_109 | HOH_D_16   | N7-G_C_60,O6-G_C_60,O6-G_D_107,N3-C_D_108 |
| 2fmt    | A_C_76  | HOH_C_520  | O2-C_C_75,N3-C_C_75                       |
| 2gdi    | A_X_75  | HOH_X_373  | OP2-G_X_76,N7-G_X_76                      |
| 1l2x    | A_A_24  | HOH_A_189  | O2'-C_A_8,N7-A_A_25                       |
| 1b23    | A_R_65  | HOH_R_992  | OP2-A_R_66,N7-A_R_66                      |
| 3egz    | A_B_56  | HOH_B_386  | O2'-A_B_55,N3-A_B_55                      |
| 4ig8    | A_C_12  | HOH_C_102  | OP2-A_C_13,N7-A_C_13                      |
| 1t0e    | A_C_11  | HOH_C_218  | OP2-G_C_12,N7-G_C_12                      |
| 3rg5    | A_B_38  | HOH_B_82   | O2-U_B_33,OP2-A_B_37,N7-A_B_37            |
| 4m30    | A_D_2   | HOH_D_210  | OP2-A_D_3,N7-A_D_3                        |
| 1g2e    | A_B_7   | HOH_A_262  | OP2-U_B_8,O-LEU_A_80                      |
| 3zp8    | A_A_29  | HOH_A_2140 | O3'-A_A_27,OP1-A_A_28                     |
| 2a43    | A_A_24  | HOH_A_551  | O2'-C_A_7,N7-A_A_25                       |
| 3td0    | A_A_17  | HOH_A_158  | OP1-G_A_19,N7-G_A_19                      |
| 4lvz    | A_A_55  | HOH_A_399  | O6-G_A_24,O2'-G_A_54,N3-G_A_54            |
| 3td0    | A_B_40  | HOH_B_165  | OP1-G_B_42,N7-G_B_42                      |
| 2hw8    | A_B_27  | HOH_B_222  | O3'-G_B_23,OP1-C_B_24                     |
| 3eph    | A_E_29  | HOH_A_447  | OP2-G_E_30,N7-G_E_30                      |

|      |          |            |                                                    |
|------|----------|------------|----------------------------------------------------|
| 2qbz | A_X_61   | HOH_X_431  | O2-C_X_78,N3-C_X_78,N7-A_X_79                      |
| 3d2v | A_B_23   | HOH_B_194  | OP2-G_B_24,N7-G_B_24                               |
| 1k8w | A_B_404  | HOH_B_623  | OP2-A_B_405,N7-A_B_405                             |
| 3ok4 | A_V_4    | HOH_N_150  | P-A_N_7,OP2-A_N_7,OP2-U_V_5,OP2-C_4_3              |
| 3ok4 | A_P_7    | HOH_P_181  | OP2-G_H_10,N7-G_H_10,OP2-C_P_8,OP2-U_X_6           |
| 2vpl | A_B_38   | HOH_B_2064 | O3'-G_B_34,P-A_B_35,OP1-A_B_35                     |
| 1q2r | A_F_37   | HOH_F_45   | O2-C_F_32,O2-C_F_39                                |
| 1et4 | A_C_416  | HOH_C_1605 | O2-U_C_415,OP2-A_C_417,N7-A_C_417                  |
| 3eph | A_F_58   | HOH_F_88   | O5'-U_F_59,OP2-C_F_60                              |
| 4n0t | A_B_45   | HOH_B_215  | OG1-THR_A_202,N7-A_B_47                            |
| 4n0t | A_B_93   | HOH_B_264  | OP2-A_B_94,N7-A_B_94                               |
| 1et4 | A_E_116  | HOH_E_1284 | O2-U_E_115,OP2-A_E_117,N7-A_E_117                  |
| 1s72 | A_0_939  | HOH_0_3152 | O2'-U_0_1028,O2-U_0_1028                           |
| 1s72 | A_0_1132 | HOH_0_3419 | O2'-G_0_1131,N3-G_0_1131,O3'-G_0_2522,OP1-U_0_2523 |
| 1s72 | A_0_2455 | HOH_0_3599 | N1-A_0_2437,O2-C_0_2454,N3-C_0_2454                |
| 1s72 | A_0_2062 | HOH_0_4160 | O3'-C_0_2651,O2'-C_0_2651                          |
| 1s72 | A_0_37   | HOH_0_4186 | OP2-G_0_38,N7-G_0_38                               |
| 1s72 | A_0_2488 | HOH_0_4290 | N3-C_0_2487,O2-U_0_2535                            |
| 1s72 | A_0_565  | HOH_0_4500 | N1-A_0_593,N3-A_0_593,O4'-G_0_1265                 |
| 1s72 | A_0_907  | HOH_0_5051 | OP2-A_0_908,N7-A_0_908                             |
| 1s72 | A_0_1572 | HOH_0_5162 | O4'-G_0_1496,O2'-G_0_1496,N1-A_0_1626              |
| 1s72 | A_0_1200 | HOH_0_5253 | O2-U_0_1198,O5'-C_0_1201,O4'-C_0_1201              |
| 1s72 | A_0_1123 | HOH_0_5521 | OP2-U_0_1122,O4'-C_0_1238,O2'-C_0_1238             |
| 1s72 | A_0_923  | HOH_0_5533 | O4'-G_0_2481,O4-U_0_2484                           |
| 1s72 | A_0_1712 | HOH_0_5765 | N1-A_0_1711,O2-C_0_1816                            |
| 1s72 | A_0_2238 | HOH_0_6164 | P-C_0_2239,OP2-C_0_2239,O5'-C_0_2239               |
| 1s72 | A_0_331  | HOH_0_6338 | O3'-U_0_346,O2'-U_0_346                            |
| 1s72 | A_0_1487 | HOH_0_7109 | O2'-A_0_1413,N3-A_0_1413,O4'-A_0_1414              |
| 1s72 | A_0_2840 | HOH_0_7140 | O2'-C_0_2839,OP2-A_0_2841,N7-A_0_2841,O6-G_0_2842  |
| 1s72 | A_0_189  | HOH_0_8616 | N3-C_0_188,O4'-G_0_206,O2'-G_0_206                 |
| 1s72 | A_0_1840 | HOH_0_8621 | P-U_0_832,OP1-U_0_832,OP2-U_0_832                  |
| 1s72 | A_0_2101 | HOH_0_8836 | OP1-A_0_2479,OP2-G_0_2480,OG-SER_C_63              |
| 1s72 | A_0_1502 | HOH_0_9437 | O3'-G_0_1445,O2'-G_0_1445                          |
| 1s72 | A_0_1733 | HOH_0_9660 | N1-A_0_1732,O3'-A_0_2089,O2'-A_0_2089              |
| 1s72 | A_0_2485 | HOH_0_9765 | O2'-C_0_2105,O2-C_0_2105,O2-U_0_2484               |
| 1s72 | A_0_395  | HOH_0_9812 | O2'-A_0_216,O4'-G_0_394                            |
| 1s72 | A_0_721  | HOH_0_9863 | N1-A_0_708,O-VAL_O_113                             |
| 1s72 | A_9_52   | HOH_9_8392 | O4'-C_9_31,O2'-C_9_31                              |
| 1s72 | A_9_3    | HOH_9_8477 | O4'-U_9_2,O3'-U_9_2                                |
| 1s72 | A_0_2038 | HOH_B_8622 | OP2-A_0_2039,N7-A_0_2039                           |

|      |          |            |                                            |
|------|----------|------------|--------------------------------------------|
| 1s72 | A_0_2896 | HOH_X_4132 | O2'-A_0_2727,N3-A_0_2727                   |
| 3b31 | U_B_6210 | HOH_A_6205 | O2'-A_A_6184,N3-A_A_6184                   |
| 1feu | U_B_80   | HOH_B_30   | OP2-G_B_81,N7-G_B_81                       |
| 4jah | U_E_2    | HOH_E_117  | OP2-G_E_3,N7-G_E_3                         |
| 4e48 | U_D_9    | HOH_D_205  | OP2-G_D_10,N7-G_D_10                       |
| 3fo4 | U_A_49   | HOH_A_327  | N3-A_A_21,O2-U_A_47                        |
| 4jah | U_F_10   | HOH_F_115  | OP2-G_F_11,N7-G_F_11                       |
| 3ftf | U_D_1522 | HOH_D_625  | OP2-G_D_1523,N7-G_D_1523                   |
| 1qf6 | U_B_8    | HOH_B_133  | N7-G_B_15,O6-G_B_15                        |
| 2q1o | U_D_108  | HOH_D_1113 | OP2-G_D_109,N7-G_D_109                     |
| 3la5 | U_A_49   | HOH_A_298  | N3-A_A_21,O2-C_A_47                        |
| 2v7r | U_A_5    | HOH_A_2034 | OP2-G_A_6,N7-G_A_6                         |
| 4lvz | U_A_42   | HOH_A_258  | O2'-G_A_41,N3-G_A_41                       |
| 4lx6 | U_A_49   | HOH_A_711  | N3-A_A_21,O2-C_A_47                        |
| 2vuq | U_A_5    | HOH_A_2016 | OP2-G_A_6,N7-G_A_6                         |
| 3hax | U_F_6    | HOH_A_501  | OG1-THR_A_83,OP2-G_F_8,O5'-G_F_8,OP1-A_F_9 |
| 2g91 | U_B_12   | HOH_B_104  | OP2-G_B_13,N7-G_B_13                       |
| 1r3e | U_E_409  | HOH_E_60   | O3'-C_E_411,O5'-G_E_412                    |
| 3k5q | U_B_1    | HOH_A_8    | OH-TYR_A_501,OP2-G_B_2                     |
| 2qbz | U_X_23   | HOH_X_313  | OP2-U_X_24,OP1-A_X_25,O4-U_X_161           |
| 4tzx | U_X_49   | HOH_X_243  | N3-A_X_21,O2-U_X_47                        |
| 1r3e | U_C_409  | HOH_A_407  | OP2-C_C_411,OP1-G_C_412,OG1-THR_A_46       |
| 1et4 | U_A_209  | HOH_A_1208 | O5'-G_A_210,O4'-G_A_210,N7-G_A_226         |
| 4e5c | U_B_16   | HOH_B_128  | OP2-G_B_17,N7-G_B_17                       |
| 1i9v | U_A_47   | HOH_A_113  | O3'-C_A_49,O2'-C_A_49                      |
| 4j1g | U_E_25   | HOH_E_104  | O2-U_E_24,O4-U_E_24                        |
| 2g3s | U_B_113  | HOH_B_136  | OP2-G_B_114,N7-G_B_114                     |
| 3d2v | U_B_41   | HOH_B_176  | O5'-G_B_1,OP2-G_B_2                        |
| 2g3s | U_C_205  | HOH_C_1610 | OP2-G_C_206,N7-G_C_206                     |
| 1et4 | U_B_309  | HOH_B_1148 | O5'-G_B_310,O4'-G_B_310,N7-G_B_326         |
| 1dfu | U_N_80   | HOH_N_511  | OP2-G_N_81,N7-G_N_81                       |
| 3boy | U_D_1    | HOH_D_121  | OP2-U_D_2,O4'-U_D_2                        |
| 3boy | U_D_8    | HOH_D_230  | OP2-U_D_9,O5'-U_D_9,O4'-U_D_9              |
| 3boy | U_D_15   | HOH_D_274  | OP2-U_D_16,O4'-U_D_16                      |
| 2g3s | U_G_405  | HOH_G_66   | OP2-G_G_406,N7-G_G_406                     |
| 2g3s | U_H_413  | HOH_H_438  | OP2-G_H_414,N7-G_H_414                     |
| 3eph | U_E_47   | HOH_E_130  | N7-A_E_21,N7-G_E_46                        |
| 2g3s | U_J_513  | HOH_J_522  | OP2-G_J_514,N7-G_J_514                     |
| 1et4 | U_C_409  | HOH_C_1289 | O5'-G_C_410,O4'-G_C_410,N7-G_C_426         |
| 3eph | U_F_51   | HOH_F_83   | OP2-A_F_52,O5'-A_F_52,N7-A_F_52            |
| 1et4 | U_D_509  | HOH_D_1198 | O5'-G_D_510,N7-G_D_526                     |
| 2bgg | U_Q_15   | HOH_Q_2019 | OP1-U_Q_16,O3'-U_Q_16                      |

|      |          |            |                                                                |
|------|----------|------------|----------------------------------------------------------------|
| 4n0t | U_B_38   | HOH_B_271  | N7-G_B_39,O2'-A_B_40                                           |
| 1et4 | U_E_109  | HOH_E_1587 | O5'-G_E_110,O4'-G_E_110,N7-G_E_126                             |
| 4qik | U_C_11   | HOH_D_137  | N7-G_C_12,O6-G_D_12                                            |
| 4wrt | U_R_12   | HOH_B_839  | O-ASN_B_670,OD1-ASN_B_670                                      |
| 1s72 | U_0_454  | HOH_0_3591 | O2'-U_0_1362,O4'-G_0_1363                                      |
| 1s72 | U_0_1724 | HOH_0_4194 | OP1-C_0_1431,OP2-C_0_1725                                      |
| 1s72 | U_0_1359 | HOH_0_4211 | O4'-A_0_2101,N3-G_0_2537                                       |
| 1s72 | U_0_1771 | HOH_0_4322 | O2'-A_0_1886,N3-A_0_1886                                       |
| 1s72 | U_0_675  | HOH_0_4494 | OP1-A_0_674,O5'-A_0_674                                        |
| 1s72 | U_0_55   | HOH_0_4853 | N7-G_0_56,N1-A_0_70                                            |
| 1s72 | U_0_779  | HOH_0_5003 | OP2-A_0_780,N7-A_0_780                                         |
| 1s72 | U_0_1838 | HOH_0_5023 | P-A_0_1839,OP2-A_0_1839,O5'-A_0_1839,N1-A_0_2622               |
| 1s72 | U_0_325  | HOH_0_5053 | OP2-G_0_326,N7-G_0_326                                         |
| 1s72 | U_0_1220 | HOH_0_5489 | OP2-G_0_1221,N7-G_0_1221                                       |
| 1s72 | U_0_1813 | HOH_0_6210 | OP2-A_0_1815,O4-U_0_1817                                       |
| 1s72 | U_0_777  | HOH_0_7071 | O4'-U_0_470,O2-C_0_881                                         |
| 1s72 | U_0_170  | HOH_0_8545 | O2'-A_0_169,N3-G_0_219                                         |
| 1s72 | U_0_454  | HOH_0_8546 | O2'-G_0_640,N3-G_0_640,O4'-G_0_641                             |
| 1s72 | U_0_2424 | HOH_0_8614 | O2'-G_0_2295,O4'-A_0_2425                                      |
| 1s72 | U_0_170  | HOH_0_8675 | O4'-G_0_219,N3-G_0_219                                         |
| 1s72 | U_0_1980 | HOH_0_8778 | O3'-C_0_2626,O2'-C_0_2626                                      |
| 1s72 | U_0_1488 | HOH_0_8837 | O2'-G_0_786,N3-G_0_786,O4'-G_0_787                             |
| 1s72 | U_0_866  | HOH_0_8845 | N7-A_0_776,O5'-A_0_867                                         |
| 1s72 | U_0_2484 | HOH_0_9127 | O2'-G_0_2481,N3-G_0_2481                                       |
| 1s72 | U_0_1835 | HOH_0_9532 | O4'-A_0_876,O2-C_0_1834                                        |
| 1s72 | U_0_1017 | HOH_0_9564 | OP2-A_0_1018,N7-A_0_1018                                       |
| 1s72 | U_0_2837 | HOH_B_8579 | O2'-G_0_2845,OE1-GLU_B_22,OE2-GLU_B_22                         |
| 4oji | G_A_47   | HOH_A_221  | OP2-G_A_48,N7-G_A_48                                           |
| 3sj2 | G_A_8    | HOH_A_131  | OP2-G_A_9,N7-G_A_9                                             |
| 4e48 | G_B_27   | HOH_A_217  | O2-U_A_15,O2-U_B_26                                            |
| 3czw | G_X_11   | HOH_X_522  | OP2-A_X_12,N7-A_X_12                                           |
| 2val | G_B_5    | HOH_B_2013 | OP2-A_B_6,N7-A_B_6                                             |
| 1f27 | G_A_13   | HOH_A_186  | OP2-A_A_14,N7-A_A_14                                           |
| 3hju | G_E_9    | HOH_A_338  | OG1-THR_A_83,OP2-G_E_11,O5'-G_E_11,OP1-C_E_12                  |
| 2gdi | G_X_29   | HOH_X_223  | O3'-U_X_28,O2-U_X_28,OP2-C_X_30                                |
| 2ho7 | G_B_102  | HOH_B_313  | P-G_B_128,OP2-G_B_128,N7-G_B_128                               |
| 4qlm | G_A_9    | HOH_A_301  | O5'-A_A_10,O3'-A_A_10,P-A_A_11,OP2-A_A_11,O5'-A_A_11,N7-A_A_11 |
| 3czw | G_X_8    | HOH_X_537  | OP2-A_X_9,N7-A_X_9                                             |
| 4wfl | G_A_76   | HOH_A_339  | P-G_A_77,OP2-G_A_77                                            |
| 2oiu | G_Q_1    | HOH_Q_89   | O6-G_Q_2,O4-U_Q_49,O4-U_Q_50                                   |
| 1csl | G_A_46   | HOH_A_93   | OP2-G_A_47,N7-G_A_47                                           |



|      |         |            |                                                |
|------|---------|------------|------------------------------------------------|
| 2gdi | G_X_72  | HOH_X_365  | O2'-G_X_21,N1-A_X_43                           |
| 2zy6 | G_A_26  | HOH_A_97   | O4-U_A_8,OP2-A_A_27                            |
| 1qrs | G_B_10  | HOH_B_802  | O2'-A_B_26,N3-A_B_26                           |
| 1feu | G_B_75  | HOH_B_196  | O4-U_B_74,O2-U_C_103,OD2-ASP_A_87              |
| 3sj2 | G_B_8   | HOH_B_39   | OP2-G_B_9,N7-G_B_9                             |
| 1nuv | G_A_24  | HOH_A_427  | N7-A_A_25,O6-G_A_26                            |
| 3q3z | G_V_58  | HOH_V_158  | N1-A_V_18,O2'-A_V_57,N3-A_V_57,O4'-C2E_V_84    |
| 3la5 | G_A_44  | HOH_A_126  | OP2-A_A_45,N7-A_A_45                           |
| 1d4r | G_B_12  | HOH_B_113  | O6-G_A_16,N7-G_B_13,O6-G_B_13                  |
| 4o41 | G_B_202 | HOH_B_358  | OP2-A_B_203,N7-A_B_203                         |
| 3sj2 | G_B_14  | HOH_B_175  | OP2-G_B_15,N7-G_B_15                           |
| 1nlc | G_A_7   | HOH_A_241  | OP2-A_A_8,N7-G_A_9,O6-G_A_9                    |
| 4oog | G_D_22  | HOH_D_231  | N7-G_D_23,O6-G_D_23                            |
| 3r1c | G_A_3   | HOH_A_107  | OP2-G_A_4,N7-G_A_4                             |
| 1t0e | G_C_14  | HOH_C_243  | OP2-U_C_15,O4-SO4_C_201                        |
| 1fuf | G_A_1   | HOH_A_56   | N7-G_A_2,O2'-U_B_20                            |
| 1nuv | G_E_19  | HOH_E_164  | OP2-G_E_20,N7-G_E_20                           |
| 1feu | G_E_72  | HOH_F_341  | O6-G_F_102,O4-U_F_103                          |
| 4kq0 | G_B_4   | HOH_B_116  | OP2-G_B_5,N7-G_B_5                             |
| 1lng | G_B_166 | HOH_B_440  | O3'-G_B_167,O2'-G_B_167,O2'-G_B_214            |
| 2v6w | G_A_4   | HOH_A_2026 | OP2-A_A_5,N7-A_A_5                             |
| 3td1 | G_A_13  | HOH_A_159  | OP2-A_A_14,N7-A_A_14                           |
| 2dr8 | G_B_1   | HOH_B_34   | N1-A_B_32,OD1-ASN_A_292                        |
| 2gdi | G_Y_29  | HOH_Y_347  | O4'-U_Y_28,O2-U_Y_28,OP2-C_Y_30                |
| 4lvz | G_A_54  | HOH_A_321  | O2'-A_A_22,N7-A_A_55                           |
| 1qcu | G_A_1   | HOH_A_390  | OP2-G_A_2,N7-G_A_2,OP2-C_C_102                 |
| 1r3e | G_D_408 | HOH_D_120  | OP1-G_D_412,N7-G_D_412                         |
| 2ez6 | G_C_12  | HOH_C_49   | P-A_C_14,OP2-A_C_14                            |
| 4kq0 | G_E_4   | HOH_E_118  | OP2-G_E_5,N7-G_E_5                             |
| 3r1c | G_E_3   | HOH_E_445  | OP2-G_E_4,N7-G_E_4                             |
| 1l9a | G_B_177 | HOH_B_2    | N1-A_B_176,N3-C_B_221,N3-G_B_222               |
| 4c8y | G_C_26  | HOH_A_2093 | OP2-G_C_27,N7-G_C_27                           |
| 3gvn | G_A_4   | HOH_A_41   | OP2-A_A_5,N7-A_A_5                             |
| 1efw | G_C_45  | HOH_C_2046 | O4'-A_C_9,N3-A_C_9,O4'-G7M_C_46                |
| 2qbz | G_X_73  | HOH_X_315  | O2-C_X_69,OP2-A_X_72,N7-A_X_72                 |
| 4n48 | G_D_1   | HOH_D_204  | OP2-A_D_2,N7-A_D_2,O2G-MGT_D_101,O2B-MGT_D_101 |
| 4lvz | G_A_4   | HOH_A_498  | OP2-A_A_5,N7-A_A_5,O6-G_A_6                    |
| 2xsl | G_C_5   | HOH_C_2018 | OP2-A_C_6,N7-A_C_6                             |
| 1dqh | G_B_13  | HOH_B_102  | OP2-G_B_14,N7-G_B_14                           |
| 1dqh | G_B_17  | HOH_B_111  | OP2-G_B_18,N7-G_B_18                           |
| 4c8z | G_C_25  | HOH_C_2007 | N3-G_C_21,O4'-A_C_23,N7-A_C_24                 |

|      |          |            |                                           |
|------|----------|------------|-------------------------------------------|
| 3r1c | G_J_6    | HOH_J_113  | OP2-G_J_7,N7-G_J_7                        |
| 3ts2 | G_V_21   | HOH_V_311  | O2'-C_V_20,O6-G_V_22                      |
| 3d0u | G_A_77   | HOH_A_213  | O3'-G_A_111,O2'-G_A_111,O2'-G_A_152       |
| 1wpu | G_C_3    | HOH_A_3179 | O-GLY_A_101,O-LEU_A_102                   |
| 3r1c | G_K_6    | HOH_K_433  | OP2-G_K_7,N7-G_K_7                        |
| 4un3 | G_A_33   | HOH_A_2066 | O3'-A_A_34,P-A_A_35,OP1-A_A_35,OP2-A_A_35 |
| 3rw6 | G_H_18   | HOH_H_68   | N3-A_H_17,N1-A_H_45                       |
| 3rw6 | G_H_14   | HOH_H_72   | O2-C_H_10,O2'-G_H_52,N3-G_H_52            |
| 3ova | G_C_1    | HOH_A_440  | OD1-ASN_A_292,N1-A_C_32                   |
| 3rw6 | G_F_14   | HOH_F_63   | O2-C_F_10,O2'-G_F_52,N3-G_F_52            |
| 3d2v | G_B_24   | HOH_B_260  | OP2-G_B_25,N7-G_B_25                      |
| 3r1c | G_M_3    | HOH_M_139  | OP2-G_M_4,N7-G_M_4                        |
| 3ok4 | G_H_9    | HOH_P_181  | OP2-G_H_10,N7-G_H_10,OP2-C_P_8,OP2-U_X_6  |
| 3r1c | G_M_6    | HOH_M_390  | OP2-G_M_7,N7-G_M_7                        |
| 1dfu | G_N_75   | HOH_P_100  | O2-U_M_103,O4-U_N_74,OD1-ASP_P_90         |
| 3rw6 | G_F_18   | HOH_F_109  | OP2-G_F_19,N7-G_F_19                      |
| 3rw6 | G_F_35   | HOH_F_123  | O2-C_F_25,N3-C_F_25,N3-G_F_26,O2-U_F_34   |
| 2g3s | G_E_302  | HOH_F_361  | O2-C_F_316,N3-C_F_316                     |
| 3r2c | G_R_2    | HOH_R_14   | N3-G_R_1,OP2-C_R_3                        |
| 3r2c | G_S_2    | HOH_S_151  | N3-G_S_1,OP2-C_S_3                        |
| 3r1c | G_Q_3    | HOH_Q_9    | OP2-G_Q_4,N7-G_Q_4                        |
| 2vpl | G_B_2    | HOH_B_2104 | O2-C_B_49,N3-C_B_49                       |
| 3r1c | G_Q_6    | HOH_Q_361  | OP2-G_Q_7,N7-G_Q_7                        |
| 1et4 | G_C_426  | HOH_C_1188 | O2-U_C_409,O2-C_C_421,O2'-A_C_425         |
| 3r1c | G_U_3    | HOH_U_336  | OP2-G_U_4,N7-G_U_4                        |
| 3r1c | G_W_6    | HOH_W_473  | OP2-G_W_7,N7-G_W_7                        |
| 4c8y | G_C_25   | HOH_C_2015 | N3-G_C_21,N7-A_C_24                       |
| 3r1c | G_e_6    | HOH_e_479  | OP2-G_e_7,N7-G_e_7                        |
| 3r1c | G_g_3    | HOH_g_412  | OP2-G_g_4,N7-G_g_4                        |
| 1et4 | G_D_501  | HOH_D_1472 | OP2-G_D_502,N7-G_D_502                    |
| 4n0t | G_B_96   | HOH_B_391  | N1-A_B_34,OP2-A_B_97                      |
| 3ol9 | G_C_693  | HOH_C_786  | OP2-A_C_694,N7-A_C_694                    |
| 2qux | G_O_7    | HOH_O_27   | OP2-A_O_8,N7-A_O_8                        |
| 1tfw | G_E_1    | HOH_B_1717 | N1-A_H_73,OD1-ASN_B_292                   |
| 3ol9 | G_K_693  | HOH_K_1234 | OP2-A_K_694,N7-A_K_694                    |
| 3ol9 | G_O_693  | HOH_O_816  | OP2-A_O_694,N7-A_O_694                    |
| 1s72 | G_0_2428 | HOH_0_3288 | O2-C_0_2427,O2'-C_0_2464,O2-C_0_2464      |
| 1s72 | G_0_553  | HOH_0_3580 | OP2-G_0_554,N7-G_0_554                    |
| 1s72 | G_0_775  | HOH_0_3941 | OP2-A_0_776,N7-A_0_867                    |
| 1s72 | G_0_2570 | HOH_0_4335 | OP2-C_0_2565,N1-A_0_2569                  |
| 1s72 | G_0_1868 | HOH_0_4471 | OP2-A_0_1869,N7-A_0_1869                  |
| 1s72 | G_0_1475 | HOH_0_4666 | OP2-A_0_1476,N7-A_0_1476                  |

|      |          |            |                                        |
|------|----------|------------|----------------------------------------|
| 1s72 | G_0_2516 | HOH_0_4936 | N1-A_0_2503,OP2-A_0_2517               |
| 1s72 | G_0_381  | HOH_0_5186 | N7-G_0_406,O6-G_0_406                  |
| 1s72 | G_0_2617 | HOH_0_5201 | OP1-C_0_1750,O2'-OMG_0_2588            |
| 1s72 | G_0_1703 | HOH_0_5264 | OP2-G_0_1704,N7-G_0_1704               |
| 1s72 | G_0_588  | HOH_0_5317 | OP2-U_0_567,N7-G_0_568,O6-G_0_568      |
| 1s72 | G_0_301  | HOH_0_5339 | OP2-A_0_302,N7-A_0_302                 |
| 1s72 | G_0_1837 | HOH_0_5867 | OP1-U_0_883,OP2-U_0_883                |
| 1s72 | G_0_264  | HOH_0_6748 | O6-G_0_246,OH-TYR_M_5                  |
| 1s72 | G_0_1190 | HOH_0_7173 | O2-U_0_1187,O4'-A_0_1189,N3-A_0_1189   |
| 1s72 | G_0_1484 | HOH_0_8618 | O4-U_0_1457,N7-A_0_1458,N7-A_0_1485    |
| 1s72 | G_0_901  | HOH_0_8636 | O2-C_0_764,N3-C_0_764,O2-U_0_900       |
| 1s72 | G_0_1979 | HOH_0_8790 | O2'-C_0_2625,O2-C_0_2625,O4'-C_0_2626  |
| 1s72 | G_0_2046 | HOH_0_9715 | N1-A_0_1729,N7-A_0_1732                |
| 1s72 | G_0_2072 | HOH_0_9849 | O2'-C_0_2533,O2-C_0_2533,O4'-C_0_2534  |
| 1s72 | G_0_2075 | HOH_0_9852 | N3-A_0_2062,OP1-U_0_2064               |
| 1s72 | G_0_1239 | HOH_0_9920 | OP2-G_0_1240,N7-G_0_1240               |
| 1j9h | C_A_5    | HOH_A_159  | OP2-G_A_6,N7-G_A_6                     |
| 3egz | C_B_42   | HOH_A_422  | OD1-ASP_A_287,OD2-ASP_A_287            |
| 4k31 | C_B_4    | HOH_B_244  | OP2-G_B_5,N7-G_B_5                     |
| 1j9h | C_B_14   | HOH_B_162  | OP2-G_B_15,N7-G_B_15                   |
| 1j9h | C_C_23   | HOH_C_121  | OP2-G_C_24,N7-G_C_24                   |
| 1j9h | C_D_32   | HOH_D_112  | OP2-G_D_33,N7-G_D_33                   |
| 3fo4 | C_A_28   | HOH_A_382  | OP2-G_A_29,N7-G_A_29                   |
| 4k31 | C_C_4    | HOH_C_267  | OP2-G_C_5,N7-G_C_5                     |
| 3fo4 | C_A_54   | HOH_A_466  | OP2-G_A_55,N7-G_A_55                   |
| 3mei | C_A_15   | HOH_B_54   | OP1-U_A_16,O6-G_B_8                    |
| 1lng | C_B_218  | HOH_B_403  | O6-G_B_204,O2'-G_B_217,N3-G_B_217      |
| 4j5v | C_B_212  | HOH_B_416  | OP2-G_B_213,N7-G_B_213                 |
| 2ao5 | C_C_3    | HOH_C_12   | OP2-G_C_4,O5'-G_C_4,O4'-G_C_4,N7-G_C_4 |
| 1yz9 | C_C_8    | HOH_C_167  | OP2-G_C_9,N7-G_C_9                     |
| 3cgr | C_A_2    | HOH_A_44   | OP2-G_A_3,N7-G_A_3                     |
| 4lx6 | C_A_54   | HOH_A_712  | O2'-A_A_24,N3-A_A_24                   |
| 3la5 | C_A_54   | HOH_A_377  | OP2-A_A_55,N7-A_A_55                   |
| 1duq | C_H_427  | HOH_G_636  | O2'-A_H_426,N3-A_H_426                 |
| 3td1 | C_A_21   | HOH_A_190  | OP2-G_A_22,N7-G_A_22                   |
| 4lvz | C_A_46   | HOH_A_346  | OP2-A_A_47,N7-A_A_47                   |
| 1lnt | C_B_19   | HOH_A_217  | O6-G_A_7,O2'-G_B_18,N3-G_B_18          |
| 3la5 | C_A_54   | HOH_A_432  | O2'-A_A_24,N3-A_A_24,O4'-C_A_53        |
| 3gvn | C_B_69   | HOH_B_44   | OP2-A_B_70,N7-A_B_70                   |
| 4p5j | C_A_74   | HOH_A_292  | N1-A_A_40,OP1-U_A_73                   |
| 1k8w | C_B_415  | HOH_A_577  | N3-A_B_413,OD1-ASN_A_26                |
| 2g3s | C_E_303  | HOH_E_319  | OP2-G_E_304,N7-G_E_304                 |

|                                                            |          |            |                                                                      |
|------------------------------------------------------------|----------|------------|----------------------------------------------------------------------|
| 3ok4                                                       | C_B_8    | HOH_R_299  | N7-G_B_9,OP2-A_J_7,P-U_R_5,OP2-U_R_5,O5'-U_R_5                       |
| 4oo8                                                       | C_B_67   | HOH_A_1408 | O-THR_A_1098,OP2-A_B_68                                              |
| 2g3s                                                       | C_F_311  | HOH_F_356  | OP2-G_F_312,N7-G_F_312                                               |
| 4w5o                                                       | C_B_11   | HOH_A_1181 | OE1-GLU_A_637,O-GLY_A_670                                            |
| 4qm6                                                       | C_C_2    | HOH_C_106  | OE1-GLN_A_83,OG-SER_A_85                                             |
| 4qm6                                                       | C_D_2    | HOH_D_104  | OE1-GLN_B_83,OG-SER_B_85                                             |
| 4un3                                                       | C_A_67   | HOH_A_2141 | OP2-A_A_68,O-THR_B_1098                                              |
| 4un5                                                       | C_A_67   | HOH_A_2213 | OP2-A_A_68,O-THR_B_1098                                              |
| 1s72                                                       | C_0_770  | HOH_0_3530 | OP2-G_0_771,N7-G_0_771                                               |
| 1s72                                                       | C_0_1753 | HOH_0_3604 | O2-U_0_1749,N7-G_0_1751                                              |
| 1s72                                                       | C_0_1708 | HOH_0_4214 | O3'-G_0_1760,OP1-U_0_1761,O-LYS_P_81                                 |
| 1s72                                                       | C_0_899  | HOH_0_4310 | O2'-A_0_897,N3-A_0_897                                               |
| 1s72                                                       | C_0_905  | HOH_0_4683 | OP2-C_0_906,O-ARG_L_8                                                |
| 1s72                                                       | C_0_2737 | HOH_0_5643 | OP1-G_0_2738,O5'-G_0_2738,OP2-A_0_2739                               |
| 1s72                                                       | C_0_1184 | HOH_0_5744 | O2-C_0_1183,N3-C_0_1183                                              |
| 1s72                                                       | C_0_2526 | HOH_0_6452 | O2'-C_0_2496,O2-C_0_2496                                             |
| <b>Instances corresponding to Figure S4b[52 instances]</b> |          |            |                                                                      |
| 2oe5                                                       | A_B_1492 | HOH_A_156  | O6-G_A_1408,O-HOH_A_199,O-HOH_B_193,O-HOH_B_202,O-HOH_B_202          |
| 3nj7                                                       | A_A_7    | HOH_A_21   | N7-G_A_8,O-HOH_A_46,O-HOH_A_64,O-HOH_A_65                            |
| 3nj6                                                       | A_A_7    | HOH_A_68   | N7-G_A_8,O-HOH_A_16,O-HOH_A_22,O-HOH_A_33                            |
| 3nj7                                                       | A_B_7    | HOH_B_17   | N7-G_B_8,O-HOH_B_34,O-HOH_B_110                                      |
| 3nj7                                                       | A_C_7    | HOH_C_18   | N7-G_C_8,O-HOH_C_26,O-HOH_C_50,O-HOH_C_168                           |
| 3nj7                                                       | A_D_7    | HOH_D_15   | N7-G_D_8,O-HOH_D_44,O-HOH_D_102                                      |
| 3nj7                                                       | A_E_7    | HOH_E_24   | N7-G_E_8,O-HOH_E_38,O-HOH_E_107                                      |
| 3nj7                                                       | A_F_7    | HOH_F_20   | N7-G_F_8,O-HOH_E_159,O-HOH_F_48,O-HOH_F_175                          |
| 2a43                                                       | A_A_24   | HOH_A_544  | O5'-A_A_25,O-HOH_A_551,O-HOH_A_602                                   |
| 3tzt                                                       | A_A_53   | HOH_B_59   | N7-G_B_107,O-HOH_A_26,O-HOH_B_22                                     |
| 1k8w                                                       | A_B_413  | HOH_A_523  | OP1-G_B_412,O-HOH_B_526,O-HOH_B_535                                  |
| 4kyy                                                       | U_B_8    | HOH_B_202  | OP2-U_B_9,O-HOH_B_207,O-HOH_B_236                                    |
| 1f27                                                       | U_A_7    | HOH_A_87   | O6-G_B_27,O-HOH_A_44,O-HOH_A_94,O-HOH_A_129                          |
| 3k62                                                       | U_B_1    | HOH_A_13   | OG-SER_A_554,O-HOH_A_18,O-HOH_A_83                                   |
| 2gdi                                                       | U_X_28   | HOH_X_352  | O6-G_X_31,O-HOH_X_216,O-HOH_X_412                                    |
| 3k64                                                       | U_B_1    | HOH_A_19   | OG-SER_A_554,O-HOH_A_24,O-HOH_A_115                                  |
| 2zy6                                                       | U_A_13   | HOH_A_169  | OP2-C_A_15,O-HOH_A_179,O-HOH_A_182                                   |
| 3fo4                                                       | U_A_34   | HOH_A_337  | N7-A_A_64,O-HOH_A_446,O-HOH_A_457                                    |
| 2awe                                                       | U_A_4    | HOH_A_227  | OP2-G_A_5,O-HOH_A_222,O-HOH_D_49,O-HOH_D_64                          |
| 2g91                                                       | U_A_3    | HOH_A_116  | N7-G_A_4,O-HOH_A_120,O-HOH_A_162,O-HOH_A_172,O-HOH_A_180,O-HOH_A_184 |
| 1jzv                                                       | U_B_12   | HOH_B_352  | OP2-C_B_14,O-HOH_B_312,O-HOH_B_351                                   |
| 1jzv                                                       | U_D_32   | HOH_D_318  | OP1-C_D_34,O-HOH_D_310,O-HOH_D_356                                   |
| 2i82                                                       | U_E_1209 | HOH_A_2019 | O4-U_E_1215,O-HOH_E_2074,O-HOH_E_2198                                |

|                                                           |         |            |                                                            |
|-----------------------------------------------------------|---------|------------|------------------------------------------------------------|
| 4e5c                                                      | U_A_13  | HOH_A_128  | N7-G_A_14,O-HOH_A_148,O-HOH_A_177                          |
| 1zh5                                                      | U_C_9   | HOH_B_537  | O-LYS_B_54,O-HOH_C_11,O-HOH_C_36                           |
| 4mdx                                                      | U_C_2   | HOH_C_243  | O5'-U_C_1,O-HOH_B_415,O-HOH_C_234                          |
| 2g3s                                                      | U_I_505 | HOH_I_556  | N7-G_I_506,O-HOH_I_515,O-HOH_I_566                         |
| 4u35                                                      | G_B_9   | HOH_B_119  | OP2-U_B_10,O-HOH_B_117,O-HOH_B_121                         |
| 3nj7                                                      | G_C_1   | HOH_C_35   | N7-G_C_2,O-HOH_C_36,O-HOH_C_76,O-HOH_C_113                 |
| 3nj7                                                      | G_D_1   | HOH_D_43   | N7-G_D_2,O-HOH_D_52,O-HOH_D_63,O-HOH_D_87                  |
| 1feu                                                      | G_B_72  | HOH_C_351  | O4-U_C_103,O-HOH_C_347,O-HOH_C_353                         |
| 1t0e                                                      | G_A_17  | HOH_A_38   | N7-G_A_18,O-HOH_A_66,O-HOH_A_72                            |
| 3fo4                                                      | G_A_72  | HOH_A_402  | OP2-A_A_73,O-HOH_A_404,O-HOH_A_438,O-HOH_A_484             |
| 3la5                                                      | G_A_32  | HOH_A_281  | OP2-A_A_33,O-HOH_A_161,O-HOH_A_234,O-HOH_A_324             |
| 2a43                                                      | G_A_6   | HOH_A_506  | OP2-C_A_9,O-HOH_A_206,O-HOH_A_532,O-HOH_A_675              |
| 4lvz                                                      | G_A_37  | HOH_A_297  | N7-G_A_38,O-HOH_A_212,O-HOH_A_272                          |
| 3r1c                                                      | G_G_6   | HOH_G_450  | N7-G_G_7,O-HOH_G_260,O-HOH_G_300,O-HOH_G_301               |
| 1yls                                                      | G_D_201 | HOH_D_409  | N7-G_D_202,O-HOH_D_405,O-HOH_D_406,O-HOH_D_407,O-HOH_D_408 |
| 3r1c                                                      | G_I_6   | HOH_I_427  | N7-G_I_7,O-HOH_I_118,O-HOH_I_428                           |
| 3r1c                                                      | G_L_6   | HOH_L_155  | N7-G_L_7,O-HOH_L_315,O-HOH_L_522                           |
| 1dfu                                                      | G_N_72  | HOH_M_527  | O4-U_M_103,O-HOH_M_507,O-HOH_N_563                         |
| 1dfu                                                      | G_M_98  | HOH_M_537  | OP2-A_M_99,O-HOH_M_543,O-HOH_N_508,O-HOH_N_530             |
| 1dfu                                                      | G_M_98  | HOH_N_508  | O4-U_N_77,O-HOH_M_537,O-HOH_N_507,O-HOH_N_530,O-HOH_N_540  |
| 2r20                                                      | C_B_15  | HOH_B_49   | N7-G_B_16,O-HOH_B_48,O-HOH_B_66                            |
| 2r22                                                      | C_B_15  | HOH_B_47   | N7-G_B_16,O-HOH_B_46,O-HOH_B_61                            |
| 3bnt                                                      | C_A_15  | HOH_A_57   | OP2-A_A_16,O-HOH_A_69,O-HOH_A_71                           |
| 3bnq                                                      | C_A_23  | HOH_D_223  | N1-A_D_15,O-HOH_C_316,O-HOH_D_238                          |
| 1t0e                                                      | C_C_9   | HOH_C_262  | N7-G_C_10,O-HOH_C_210,O-HOH_C_241                          |
| 2ao5                                                      | C_A_7   | HOH_A_59   | N7-G_A_8,O-HOH_A_85,O-HOH_A_131                            |
| 1nlc                                                      | C_B_13  | HOH_B_258  | N7-A_B_14,O-HOH_A_168,O-HOH_B_155,O-HOH_B_321              |
| 3cgs                                                      | C_B_22  | HOH_B_64   | N7-G_B_23,O-HOH_B_43,O-HOH_B_49,O-HOH_B_71                 |
| 3wbm                                                      | C_X_12  | HOH_X_104  | OP2-C_X_13,O-HOH_A_102,O-HOH_X_106                         |
| <b>Instances corresponding to Figure S4c[9 instances]</b> |         |            |                                                            |
| 2tmv                                                      | A_R_3   | HOH_R_66   | O-HOH_R_35,O-HOH_R_65                                      |
| 4n0t                                                      | A_B_44  | HOH_A_666  | O-HOH_A_615,O-HOH_B_236,O-HOH_B_350                        |
| 4rge                                                      | U_C_1   | HOH_C_203  | O-HOH_C_204,O-HOH_C_225                                    |
| 1et4                                                      | U_A_209 | HOH_A_1713 | O-HOH_A_1208,O-HOH_A_1371,O-HOH_A_1465                     |
| 1et4                                                      | U_D_527 | HOH_D_1193 | O-HOH_D_1181,O-HOH_D_1324                                  |
| 1feu                                                      | G_C_98  | HOH_B_10   | O-HOH_B_12,O-HOH_B_13,O-HOH_B_251                          |
| 1j9h                                                      | G_B_12  | HOH_B_205  | O-HOH_B_148,O-HOH_B_158,O-HOH_B_200,O-HOH_B_220            |

|                                                                                                             |          |            |                                                                         |
|-------------------------------------------------------------------------------------------------------------|----------|------------|-------------------------------------------------------------------------|
| 1j9h                                                                                                        | G_C_21   | HOH_C_156  | O-HOH_C_116,O-HOH_C_136,O-HOH_C_140,O-HOH_C_143,O-HOH_C_208,O-HOH_D_133 |
| 3d2v                                                                                                        | G_A_60   | HOH_A_145  | O-HOH_A_104,O-HOH_A_348,O-HOH_A_383                                     |
| <b>Instances corresponding to Figure S4d, where single acceptor/water is present near the O<sup>w</sup></b> |          |            |                                                                         |
| 3ibk                                                                                                        | A_B_20   | HOH_B_52   | O4-U_B_18                                                               |
| 1l2x                                                                                                        | A_A_20   | HOH_A_73   | O-HOH_A_37                                                              |
| 2atw                                                                                                        | A_B_7    | HOH_B_2047 | O-HOH_B_1083                                                            |
| 1csl                                                                                                        | A_B_68   | HOH_B_159  | O-HOH_B_123                                                             |
| 2fmt                                                                                                        | A_D_76   | HOH_D_523  | N3-C_D_75                                                               |
| 3ivn                                                                                                        | A_B_58   | HOH_B_144  | OP2-U_B_59                                                              |
| 1m8y                                                                                                        | A_C_11   | HOH_C_50   | O-HOH_C_30                                                              |
| 1m8y                                                                                                        | A_D_11   | HOH_D_218  | OP2-A_D_16                                                              |
| 4ht9                                                                                                        | A_D_5    | HOH_D_117  | O-HOH_D_111                                                             |
| 3t5n                                                                                                        | A_C_3    | HOH_A_408  | O2-U_C_4                                                                |
| 3egz                                                                                                        | A_B_56   | HOH_B_434  | O-HOH_B_386                                                             |
| 2zm5                                                                                                        | A_C_35   | HOH_A_340  | O-HOH_C_124                                                             |
| 3k62                                                                                                        | A_B_7    | HOH_A_139  | O-HOH_A_720                                                             |
| 4un3                                                                                                        | A_A_1    | HOH_A_2003 | O-HOH_A_2002                                                            |
| 2a43                                                                                                        | A_A_21   | HOH_A_661  | O-HOH_A_588                                                             |
| 4lvz                                                                                                        | A_A_62   | HOH_A_453  | O2'-G_A_63                                                              |
| 3wbm                                                                                                        | A_X_15   | HOH_X_120  | OP2-C_X_16                                                              |
| 1n35                                                                                                        | A_C_1284 | HOH_C_1350 | O2-U_C_1283                                                             |
| 1et4                                                                                                        | A_B_304  | HOH_B_1278 | OP2-C_B_305                                                             |
| 3rw6                                                                                                        | A_F_39   | HOH_F_99   | OP2-A_F_40                                                              |
| 3ova                                                                                                        | A_C_16   | HOH_C_227  | O2-U_C_14                                                               |
| 3ova                                                                                                        | A_C_17   | HOH_C_227  | O2-U_C_14                                                               |
| 4aq7                                                                                                        | A_B_31   | HOH_B_2008 | O5'-U_B_32                                                              |
| 2vpl                                                                                                        | A_D_30   | HOH_D_2034 | N7-G_D_31                                                               |
| 1m8w                                                                                                        | A_D_16   | HOH_B_256  | O-HOH_B_246                                                             |
| 1s72                                                                                                        | A_0_2697 | HOH_0_4105 | O-HOH_0_5563                                                            |
| 1s72                                                                                                        | A_0_2460 | HOH_0_4312 | O-HOH_0_9683                                                            |
| 1s72                                                                                                        | A_0_513  | HOH_2_7692 | O-HOH_2_7177                                                            |
| 4mce                                                                                                        | U_A_4    | HOH_A_108  | OP2-G_A_5                                                               |
| 2gdi                                                                                                        | U_X_52   | HOH_X_206  | OP2-G_X_86                                                              |
| 3nnh                                                                                                        | U_E_8    | HOH_E_28   | O-HOH_E_29                                                              |
| 4mce                                                                                                        | U_B_6    | HOH_B_218  | N7-G_B_7                                                                |
| 1j6s                                                                                                        | U_B_12   | HOH_B_340  | O-HOH_B_366                                                             |
| 2xs2                                                                                                        | U_B_7    | HOH_B_2024 | O-HOH_A_2047                                                            |
| 2xs2                                                                                                        | U_B_4    | HOH_B_2029 | O-HOH_B_2010                                                            |
| 3i5y                                                                                                        | U_B_7    | HOH_A_1022 | O-GLY_A_244                                                             |
| 3nmr                                                                                                        | U_B_2    | HOH_B_12   | O-HOH_A_200                                                             |

|      |          |            |               |
|------|----------|------------|---------------|
| 2xs7 | U_B_4    | HOH_B_2006 | O-HOH_B_2008  |
| 4o41 | U_B_201  | HOH_B_347  | O-HOH_B_352   |
| 2gdi | U_X_25   | HOH_X_427  | O-HOH_X_479   |
| 2xs5 | U_D_3    | HOH_D_2007 | O-HOH_D_2008  |
| 4oog | U_D_17   | HOH_D_241  | OP2-G_D_16    |
| 1fuf | U_A_5    | HOH_A_40   | O-HOH_A_48    |
| 4rkv | U_A_1006 | HOH_A_9120 | O-HOH_A_9123  |
| 3nna | U_B_2    | HOH_B_12   | O-HOH_A_200   |
| 3rg5 | U_B_33   | HOH_B_87   | OP2-A_B_36    |
| 2awe | U_D_4    | HOH_D_171  | O-HOH_D_125   |
| 4j7l | U_B_2    | HOH_A_652  | OH-TYR_A_189  |
| 3bsx | U_D_9    | HOH_B_130  | OH-TYR_B_900  |
| 3la5 | U_A_36   | HOH_A_353  | O-HOH_A_167   |
| 1g2e | U_B_5    | HOH_A_306  | O-HOH_A_239   |
| 3d2v | U_A_18   | HOH_A_260  | O4-U_A_19     |
| 1qu2 | U_T_20   | HOH_T_1272 | O-HOH_T_1281  |
| 3rg5 | U_B_9    | HOH_B_155  | O-HOH_B_157   |
| 3rg5 | U_B_9    | HOH_B_157  | O-HOH_B_155   |
| 3oin | U_C_5    | HOH_C_37   | OP1-A_C_8     |
| 1qu2 | U_T_20   | HOH_T_1281 | O-HOH_T_1272  |
| 4tzx | U_X_34   | HOH_X_305  | N1-A_X_64     |
| 3mdg | U_C_4    | HOH_C_105  | O-SER_A_58    |
| 3fht | U_D_5    | HOH_B_519  | OE1-GLN_B_256 |
| 1et4 | U_A_223  | HOH_A_1366 | O-HOH_A_1455  |
| 3d0u | U_A_106  | HOH_A_206  | O6-G_A_108    |
| 4jk0 | U_B_502  | HOH_B_703  | O-HOH_B_701   |
| 3rw6 | U_H_38   | HOH_H_101  | O-HOH_H_100   |
| 3pey | U_B_5    | HOH_A_1444 | O-HOH_A_1416  |
| 2qwy | U_C_12   | HOH_C_1096 | OP2-A_C_13    |
| 4aq7 | U_B_72   | HOH_A_2055 | OP2-A_B_73    |
| 2db3 | U_E_6    | HOH_E_684  | O-HOH_E_1052  |
| 3rer | U_K_3    | HOH_K_362  | O-HOH_K_246   |
| 2db3 | U_F_5    | HOH_F_1296 | O-HOH_F_580   |
| 4qm6 | U_D_3    | HOH_D_119  | O-HOH_D_107   |
| 1et4 | U_C_427  | HOH_C_1264 | O-HOH_C_1559  |
| 2nz4 | U_R_17C  | HOH_R_9050 | O5'-U_R_17D   |
| 2db3 | U_G_5    | HOH_G_1003 | O-HOH_G_924   |
| 3hax | U_E_32   | HOH_E_533  | O-HOH_E_545   |
| 4kxt | U_B_20   | HOH_B_108  | O-HOH_B_112   |
| 2db3 | U_H_5    | HOH_H_928  | O-HOH_H_320   |
| 2nz4 | U_S_105  | HOH_S_9032 | N7-A_S_106    |
| 2qux | U_F_12   | HOH_F_26   | OP2-A_F_13    |

|      |          |            |               |
|------|----------|------------|---------------|
| 4krf | U_R_6    | HOH_R_108  | N7-A_R_7      |
| 2bgg | U_Q_16   | HOH_Q_2018 | O-GLN_A_329   |
| 1et4 | U_E_127  | HOH_E_1200 | O-HOH_E_1695  |
| 1s72 | U_0_713  | HOH_0_3450 | O-HOH_0_9645  |
| 1s72 | U_0_2330 | HOH_0_3494 | N3-A_0_2367   |
| 1s72 | U_0_488  | HOH_0_3563 | O-HOH_0_3053  |
| 1s72 | U_0_2117 | HOH_0_4348 | OP2-A_0_2118  |
| 1s72 | U_0_1136 | HOH_0_4468 | O-HOH_0_3475  |
| 1s72 | U_0_1454 | HOH_0_4793 | O4'-C_0_1455  |
| 1s72 | U_0_1310 | HOH_0_5322 | OP2-G_0_1311  |
| 1s72 | U_0_2541 | HOH_0_6922 | O-HOH_0_5944  |
| 1s72 | U_0_651  | HOH_0_9519 | OP2-G_0_652   |
| 1s72 | U_0_713  | HOH_0_9645 | O-HOH_0_3450  |
| 1s72 | U_0_1109 | HOH_J_247  | O-GLY_J_118   |
| 1s72 | U_0_1446 | HOH_S_8344 | O-HOH_S_8328  |
| 3ibk | G_B_17   | HOH_B_42   | O-HOH_B_41    |
| 3kmq | G_C_916  | HOH_A_496  | OE2-GLU_A_422 |
| 1xpe | G_A_7    | HOH_A_221  | O-HOH_B_231   |
| 1d4r | G_C_12   | HOH_C_159  | OP2-G_C_13    |
| 3bnl | G_B_15   | HOH_A_31   | O-HOH_B_44    |
| 3r1c | G_A_6    | HOH_A_486  | N7-G_A_7      |
| 3fo4 | G_A_38   | HOH_A_458  | O4-U_A_67     |
| 3r1c | G_B_6    | HOH_B_164  | N7-G_B_7      |
| 3fo4 | G_A_62   | HOH_A_483  | N1-A_A_35     |
| 1q96 | G_A_10   | HOH_A_378  | O-HOH_A_382   |
| 3k5y | G_B_2    | HOH_B_133  | O-HOH_B_44    |
| 1q96 | G_A_2    | HOH_A_408  | N7-G_A_3      |
| 1lng | G_B_167  | HOH_B_424  | N7-G_B_168    |
| 4lx6 | G_A_72   | HOH_A_701  | OP2-A_A_73    |
| 3k61 | G_B_2    | HOH_B_275  | O-HOH_B_44    |
| 3r1c | G_D_3    | HOH_D_203  | N7-G_D_4      |
| 3umy | G_B_2125 | HOH_B_2314 | N7-A_B_2126   |
| 3td0 | G_A_19   | HOH_A_107  | OP2-U_A_20    |
| 3v74 | G_B_5    | HOH_B_102  | O-HOH_B_114   |
| 2hw8 | G_B_11   | HOH_B_233  | N7-A_B_12     |
| 2qbz | G_X_168  | HOH_X_368  | N7-A_X_169    |
| 1wpu | G_D_3    | HOH_D_181  | O-HOH_D_247   |
| 1jbr | G_C_10   | HOH_A_188  | O-HOH_F_215   |
| 1ooa | G_C_22   | HOH_C_441  | O6-G_C_23     |
| 3d0u | G_A_24   | HOH_A_235  | N3-A_A_23     |
| 2qwy | G_A_5    | HOH_A_1153 | N7-G_A_6      |
| 2y8w | G_B_24   | HOH_B_2079 | O-HOH_B_2072  |



|      |          |            |               |
|------|----------|------------|---------------|
| 3k62 | G_B_2    | HOH_B_208  | O-HOH_B_102   |
| 3k5q | G_B_2    | HOH_B_274  | O-HOH_B_188   |
| 4m4o | G_B_54   | HOH_B_242  | N7-A_B_55     |
| 2zuf | G_B_901  | HOH_B_1176 | N3-G_B_973    |
| 4jk0 | G_B_513  | HOH_B_719  | O2-U_B_512    |
| 3boy | G_D_5    | HOH_D_42   | O-HOH_D_96    |
| 3rw6 | G_F_47   | HOH_F_69   | N7-A_F_12     |
| 2hvy | G_E_12   | HOH_E_78   | O-HOH_E_72    |
| 2hvy | G_E_1    | HOH_E_83   | O-HOH_E_81    |
| 1zx7 | G_F_24   | HOH_F_40   | OP2-U_F_25    |
| 1sds | G_F_211  | HOH_C_866  | O-HOH_F_1007  |
| 3q0o | G_D_2    | HOH_D_111  | O-HOH_D_102   |
| 4g0a | G_E_1    | HOH_A_1463 | O-HOH_A_1522  |
| 3r1c | G_T_6    | HOH_T_335  | N7-G_T_7      |
| 3r1c | G_U_6    | HOH_U_69   | N7-G_U_7      |
| 1m8w | G_F_9    | HOH_B_140  | OH-TYR_B_900  |
| 1qln | G_R_3    | HOH_A_2324 | OH-TYR_A_639  |
| 3r1c | G_b_6    | HOH_b_367  | N7-G_b_7      |
| 2o5i | G_H_1    | HOH_H_1847 | O-HOH_H_2428  |
| 3ol8 | G_B_599  | HOH_A_561  | OD2-ASP_A_160 |
| 1tfw | G_G_2    | HOH_A_529  | O-GLU_A_96    |
| 3r1c | G_j_6    | HOH_j_386  | N7-G_j_7      |
| 2qux | G_C_16   | HOH_E_181  | O-MET_E_0     |
| 3ol8 | G_J_599  | HOH_I_521  | OD2-ASP_I_160 |
| 3ol8 | G_N_599  | HOH_M_515  | OD2-ASP_M_160 |
| 1gtf | G_W_126  | HOH_W_2037 | O-HOH_W_2008  |
| 1s72 | G_0_1376 | HOH_0_4008 | O-HOH_0_3814  |
| 1s72 | G_0_2459 | HOH_0_4312 | O-HOH_0_9683  |
| 1s72 | G_0_2344 | HOH_0_4419 | O-HOH_0_6153  |
| 1s72 | G_0_2013 | HOH_0_4913 | N7-G_0_2014   |
| 1s72 | G_0_2882 | HOH_0_6443 | OP2-A_0_2883  |
| 1s72 | G_0_1752 | HOH_0_7037 | O-HOH_0_5575  |
| 1s72 | G_0_2442 | HOH_0_8703 | OP2-C_0_2443  |
| 1s72 | G_0_1216 | HOH_0_8786 | O-HOH_0_4476  |
| 1s72 | G_0_702  | HOH_0_9001 | O-HOH_0_4762  |
| 1s72 | G_0_1002 | HOH_0_9141 | OP2-U_0_1003  |
| 4oji | C_A_20   | HOH_A_242  | N1-A_A_36     |
| 1m5o | C_B_45   | HOH_B_319  | OP2-G_B_46    |
| 3dir | C_A_79   | HOH_A_307  | OP2-A_A_10    |
| 3ivn | C_A_44   | HOH_A_151  | O-HOH_A_152   |
| 3bnq | C_B_7    | HOH_A_312  | N1-A_A_17     |
| 3bnq | C_A_7    | HOH_A_317  | N7-A_A_8      |

|      |          |            |              |
|------|----------|------------|--------------|
| 3ivn | C_B_44   | HOH_B_133  | O-HOH_B_107  |
| 4e48 | C_D_5    | HOH_D_202  | OP2-U_D_6    |
| 3bnq | C_B_4    | HOH_B_207  | N7-G_B_5     |
| 1m8y | C_C_17   | HOH_C_39   | N7-A_C_18    |
| 3egz | C_B_45   | HOH_B_411  | OP2-G_B_46   |
| 3bnq | C_D_5    | HOH_C_325  | N1-A_C_17    |
| 3fo4 | C_A_39   | HOH_A_427  | N7-A_A_40    |
| 4j5v | C_B_218  | HOH_B_405  | N7-G_B_219   |
| 4j5v | C_B_215  | HOH_B_411  | N7-G_B_216   |
| 2i91 | C_D_13   | HOH_A_712  | O-HOH_A_852  |
| 3iev | C_D_1535 | HOH_D_96   | O4-U_D_1537  |
| 1l9a | C_B_170  | HOH_B_12   | O-HOH_B_14   |
| 1dqh | C_B_16   | HOH_B_104  | OP1-G_B_17   |
| 2y8w | C_B_11   | HOH_B_2036 | OP2-G_B_12   |
| 2zuf | C_B_934  | HOH_B_1175 | OP2-C_B_935  |
| 1zx7 | C_G_12   | HOH_G_23   | N7-G_G_13    |
| 3q0o | C_D_5    | HOH_D_13   | N7-A_D_6     |
| 1m8w | C_F_6    | HOH_B_256  | O-HOH_B_246  |
| 3eph | C_F_35   | HOH_F_91   | O-HOH_F_104  |
| 4c7o | C_E_11   | HOH_E_2013 | OP2-C_E_12   |
| 1s72 | C_0_1772 | HOH_0_4776 | O-HOH_0_9736 |
| 1s72 | C_0_2833 | HOH_0_6615 | N7-G_0_2834  |
| 1s72 | C_0_2526 | HOH_0_7097 | O2'-A_0_2604 |
| 1s72 | C_0_1083 | HOH_0_8565 | O-HOH_0_5514 |
| 1s72 | C_0_2895 | HOH_0_9077 | OP2-A_0_2896 |
| 1s72 | C_0_376  | HOH_0_9815 | OP2-C_0_377  |

**Table S3.** The table shows the Potential Energy values (in kcal/mol) for both the  $lp-\pi$  and  $OH-\pi$  geometries of the water-adenine contacts. The distance column defines the vertical

distance between the ring centroid and the position of the O<sup>W</sup> atom, and it ranges from 2.0 Å to 6.0 Å with 0.1 Å increments, and 6.0 Å to 8.0 Å with 1.0 Å increments. Binding energies were computed at the DLPNO/CBS level of theory by 2-point extrapolation scheme using cc-pVTZ and cc-pVQZ basis sets. The columns show the cc-pVTZ, cc-pVQZ and CBS energy values for each of the cases.

| Distance (Å) | Ip- $\pi$          |                    |                | OH- $\pi$          |                    |                |
|--------------|--------------------|--------------------|----------------|--------------------|--------------------|----------------|
|              | cc-pVTZ (kcal/mol) | cc-pVQZ (kcal/mol) | CBS (kcal/mol) | cc-pVTZ (kcal/mol) | cc-pVQZ (kcal/mol) | CBS (kcal/mol) |
| 2.4          | 6.43               | 5.36               | 4.69           | 23.85              | 22.42              | 21.44          |
| 2.5          | 3.81               | 2.85               | 2.23           | 15.85              | 14.70              | 13.90          |
| 2.6          | 1.98               | 1.19               | 0.69           | 10.04              | 9.11               | 8.46           |
| 2.7          | 0.84               | 0.08               | -0.41          | 5.92               | 5.07               | 4.47           |
| 2.8          | 0.10               | -0.56              | -0.97          | 3.10               | 2.35               | 1.82           |
| 2.9          | -0.36              | -0.92              | -1.27          | 1.18               | 0.50               | 0.01           |
| 3.0          | -0.57              | -1.08              | -1.40          | -0.13              | -0.67              | -1.05          |
| 3.1          | -0.66              | -1.12              | -1.40          | -0.95              | -1.39              | -1.71          |
| 3.2          | -0.68              | -1.08              | -1.32          | -1.48              | -1.87              | -2.14          |
| 3.3          | -0.65              | -1.00              | -1.21          | -1.75              | -2.10              | -2.36          |
| 3.4          | -0.58              | -0.87              | -1.03          | -1.86              | -2.15              | -2.35          |
| 3.5          | -0.51              | -0.76              | -0.91          | -1.88              | -2.13              | -2.30          |
| 3.6          | -0.40              | -0.65              | -0.79          | -1.84              | -2.04              | -2.19          |
| 3.7          | -0.32              | -0.53              | -0.65          | -1.72              | -1.94              | -2.10          |
| 3.8          | -0.25              | -0.44              | -0.54          | -1.62              | -1.75              | -1.84          |
| 3.9          | -0.18              | -0.35              | -0.44          | -1.52              | -1.62              | -1.71          |
| 4.0          | -0.12              | -0.23              | -0.27          | -1.38              | -1.50              | -1.60          |
| 4.1          | -0.07              | -0.20              | -0.27          | -1.27              | -1.38              | -1.46          |
| 4.2          | -0.02              | -0.25              | -0.61          | -1.17              | -1.26              | -1.34          |
| 4.3          | 0.02               | -0.09              | -0.15          | -1.07              | -1.17              | -1.25          |
| 4.4          | 0.05               | -0.05              | -0.09          | -0.97              | -1.05              | -1.12          |
| 4.5          | 0.08               | 0.01               | -0.03          | -0.89              | -0.98              | -1.06          |
| 4.6          | 0.10               | 0.04               | 0.01           | -0.82              | -0.89              | -0.96          |
| 4.7          | 0.11               | 0.06               | 0.04           | -0.75              | -0.82              | -0.88          |
| 4.8          | 0.13               | 0.08               | 0.07           | -0.69              | -0.76              | -0.82          |
| 4.9          | 0.14               | 0.10               | 0.08           | -0.64              | -0.70              | -0.75          |
| 5.0          | 0.15               | 0.11               | 0.10           | -0.58              | -0.65              | -0.70          |
| 5.1          | 0.15               | 0.12               | 0.11           | -0.54              | -0.57              | -0.61          |
| 5.2          | 0.16               | 0.13               | 0.12           | -0.49              | -0.53              | -0.56          |
| 5.3          | 0.16               | 0.12               | 0.10           | -0.47              | -0.52              | -0.56          |
| 5.4          | 0.16               | 0.16               | 0.17           | -0.42              | -0.48              | -0.53          |
| 5.5          | 0.16               | 0.18               | 0.19           | -0.40              | -0.45              | -0.49          |
| 5.6          | 0.16               | 0.13               | 0.12           | -0.37              | -0.42              | -0.47          |
| 5.7          | 0.16               | 0.15               | 0.14           | -0.34              | -0.36              | -0.38          |
| 5.8          | 0.16               | 0.15               | 0.14           | -0.31              | -0.35              | -0.38          |
| 5.9          | 0.16               | 0.18               | 0.20           | -0.30              | -0.32              | -0.33          |
| 6.0          | 0.16               | 0.15               | 0.14           | -0.28              | -0.30              | -0.31          |
| 7.0          | 0.13               | 0.11               | 0.09           | -0.15              | -0.19              | -0.22          |
| 8.0          | 0.10               | 0.05               | 0.02           | -0.08              | -0.09              | -0.09          |

**Table S4.** The table shows the Potential Energy values (in kcal/mol) for both the lp- $\pi$  and OH- $\pi$  geometries of the water-uracil interactions. Further details are given in the legend of Table S3.

| Distance<br>(Å) | lp- $\pi$             |                       |                   | OH- $\pi$             |                       |                   |
|-----------------|-----------------------|-----------------------|-------------------|-----------------------|-----------------------|-------------------|
|                 | cc-pvTZ<br>(kcal/mol) | cc-pvQZ<br>(kcal/mol) | CBS<br>(kcal/mol) | cc-pvTZ<br>(kcal/mol) | cc-pvQZ<br>(kcal/mol) | CBS<br>(kcal/mol) |
| 2.4             | 3.03                  | 2.13                  | 1.48              | 20.15                 | 19.15                 | 18.40             |
| 2.5             | 1.12                  | 0.39                  | -0.15             | 14.34                 | 13.47                 | 12.82             |
| 2.6             | -0.13                 | -0.78                 | -1.27             | 10.00                 | 9.26                  | 8.71              |
| 2.7             | -0.93                 | -1.48                 | -1.88             | 6.87                  | 6.16                  | 5.64              |
| 2.8             | -1.42                 | -1.88                 | -2.23             | 4.62                  | 4.03                  | 3.59              |
| 2.9             | -1.65                 | -2.08                 | -2.39             | 2.99                  | 2.47                  | 2.10              |
| 3.0             | -1.75                 | -2.10                 | -2.36             | 1.78                  | 1.38                  | 1.09              |
| 3.1             | -1.74                 | -2.06                 | -2.30             | 1.03                  | 0.65                  | 0.38              |
| 3.2             | -1.67                 | -1.94                 | -2.14             | 0.53                  | 0.18                  | -0.06             |
| 3.3             | -1.57                 | -1.82                 | -2.00             | 0.24                  | -0.07                 | -0.29             |
| 3.4             | -1.44                 | -1.66                 | -1.82             | 0.06                  | -0.19                 | -0.38             |
| 3.5             | -1.32                 | -1.51                 | -1.63             | -0.02                 | -0.24                 | -0.40             |
| 3.6             | -1.19                 | -1.36                 | -1.48             | -0.08                 | -0.22                 | -0.33             |
| 3.7             | -1.09                 | -1.24                 | -1.33             | -0.08                 | -0.21                 | -0.31             |
| 3.8             | -0.99                 | -1.12                 | -1.20             | -0.07                 | -0.17                 | -0.25             |
| 3.9             | -0.90                 | -1.01                 | -1.08             | -0.05                 | -0.13                 | -0.19             |
| 4.0             | -0.81                 | -0.90                 | -0.96             | 0.00                  | -0.08                 | -0.13             |
| 4.1             | -0.73                 | -0.82                 | -0.87             | 0.04                  | -0.02                 | -0.06             |
| 4.2             | -0.66                 | -0.74                 | -0.79             | 0.06                  | 0.04                  | 0.01              |
| 4.3             | -0.60                 | -0.67                 | -0.70             | 0.08                  | 0.07                  | 0.04              |
| 4.4             | -0.54                 | -0.60                 | -0.63             | 0.11                  | 0.11                  | 0.09              |
| 4.5             | -0.49                 | -0.54                 | -0.57             | 0.13                  | 0.12                  | 0.11              |
| 4.6             | -0.45                 | -0.49                 | -0.52             | 0.15                  | 0.15                  | 0.14              |
| 4.7             | -0.41                 | -0.45                 | -0.47             | 0.16                  | 0.16                  | 0.15              |
| 4.8             | -0.37                 | -0.40                 | -0.42             | 0.18                  | 0.17                  | 0.16              |
| 4.9             | -0.33                 | -0.37                 | -0.39             | 0.19                  | 0.18                  | 0.17              |
| 5.0             | -0.31                 | -0.34                 | -0.36             | 0.20                  | 0.19                  | 0.18              |
| 5.1             | -0.28                 | -0.31                 | -0.33             | 0.20                  | 0.18                  | 0.15              |
| 5.2             | -0.26                 | -0.29                 | -0.30             | 0.20                  | 0.20                  | 0.19              |
| 5.3             | -0.24                 | -0.26                 | -0.27             | 0.21                  | 0.19                  | 0.16              |
| 5.4             | -0.22                 | -0.24                 | -0.25             | 0.21                  | 0.18                  | 0.16              |
| 5.5             | -0.21                 | -0.22                 | -0.23             | 0.21                  | 0.19                  | 0.17              |
| 5.6             | -0.19                 | -0.21                 | -0.21             | 0.21                  | 0.20                  | 0.20              |
| 5.7             | -0.18                 | -0.19                 | -0.20             | 0.20                  | 0.20                  | 0.20              |
| 5.8             | -0.16                 | -0.18                 | -0.18             | 0.20                  | 0.20                  | 0.20              |
| 5.9             | -0.15                 | -0.16                 | -0.17             | 0.19                  | 0.20                  | 0.20              |
| 6.0             | -0.14                 | -0.16                 | -0.16             | 0.19                  | 0.19                  | 0.19              |
| 7.0             | -0.07                 | -0.08                 | -0.09             | 0.15                  | 0.15                  | 0.15              |
| 8.0             | -0.04                 | -0.05                 | -0.05             | 0.11                  | 0.11                  | 0.11              |

**Table S5.** The table shows the Potential Energy values (in kcal/mol) for the for both the  $lp-\pi$  and  $OH-\pi$  geometries of the water-guanine interactions. Further details are given in the legend of Table S3.

| Distance<br>(Å) | $lp-\pi$              |                       |                   | $OH-\pi$              |                       |                   |
|-----------------|-----------------------|-----------------------|-------------------|-----------------------|-----------------------|-------------------|
|                 | cc-pvTZ<br>(kcal/mol) | cc-pvQZ<br>(kcal/mol) | CBS<br>(kcal/mol) | cc-pvTZ<br>(kcal/mol) | cc-pvQZ<br>(kcal/mol) | CBS<br>(kcal/mol) |
| 2.4             | 6.55                  | 5.35                  | 4.56              | 23.29                 | 21.92                 | 20.98             |
| 2.5             | 3.91                  | 2.82                  | 2.11              | 15.52                 | 14.33                 | 13.50             |
| 2.6             | 2.06                  | 1.11                  | 0.49              | 9.91                  | 8.89                  | 8.17              |
| 2.7             | 0.83                  | 0.01                  | -0.53             | 5.94                  | 5.05                  | 4.41              |
| 2.8             | 0.07                  | -0.62                 | -1.05             | 3.25                  | 2.46                  | 1.89              |
| 2.9             | -0.41                 | -1.03                 | -1.42             | 1.40                  | 0.77                  | 0.32              |
| 3.0             | -0.66                 | -1.21                 | -1.56             | 0.20                  | -0.39                 | -0.80             |
| 3.1             | -0.77                 | -1.26                 | -1.58             | -0.60                 | -1.08                 | -1.42             |
| 3.2             | -0.79                 | -1.21                 | -1.47             | -1.03                 | -1.46                 | -1.76             |
| 3.3             | -0.78                 | -1.12                 | -1.32             | -1.28                 | -1.60                 | -1.83             |
| 3.4             | -0.72                 | -1.03                 | -1.21             | -1.37                 | -1.67                 | -1.88             |
| 3.5             | -0.64                 | -0.93                 | -1.10             | -1.37                 | -1.62                 | -1.79             |
| 3.6             | -0.58                 | -0.82                 | -0.96             | -1.30                 | -1.52                 | -1.66             |
| 3.7             | -0.49                 | -0.67                 | -0.77             | -1.21                 | -1.37                 | -1.48             |
| 3.8             | -0.41                 | -0.61                 | -0.71             | -1.09                 | -1.24                 | -1.35             |
| 3.9             | -0.35                 | -0.52                 | -0.61             | -0.99                 | -1.11                 | -1.20             |
| 4.0             | -0.27                 | -0.44                 | -0.53             | -0.86                 | -0.97                 | -1.04             |
| 4.1             | -0.21                 | -0.37                 | -0.46             | -0.77                 | -0.85                 | -0.92             |
| 4.2             | -0.16                 | -0.31                 | -0.38             | -0.67                 | -0.74                 | -0.80             |
| 4.3             | -0.13                 | -0.25                 | -0.32             | -0.58                 | -0.64                 | -0.69             |
| 4.4             | -0.08                 | -0.21                 | -0.27             | -0.48                 | -0.55                 | -0.61             |
| 4.5             | -0.06                 | -0.17                 | -0.23             | -0.41                 | -0.47                 | -0.51             |
| 4.6             | -0.02                 | -0.13                 | -0.19             | -0.35                 | -0.40                 | -0.45             |
| 4.7             | -0.01                 | -0.10                 | -0.16             | -0.29                 | -0.34                 | -0.38             |
| 4.8             | 0.00                  | -0.08                 | -0.12             | -0.25                 | -0.29                 | -0.33             |
| 4.9             | 0.03                  | -0.06                 | -0.11             | -0.20                 | -0.24                 | -0.28             |
| 5.0             | 0.04                  | -0.04                 | -0.08             | -0.16                 | -0.20                 | -0.24             |
| 5.1             | 0.05                  | -0.02                 | -0.07             | -0.13                 | -0.17                 | -0.20             |
| 5.2             | 0.05                  | -0.01                 | -0.04             | -0.10                 | -0.14                 | -0.17             |
| 5.3             | 0.06                  | 0.00                  | -0.04             | -0.07                 | -0.12                 | -0.16             |
| 5.4             | 0.07                  | 0.01                  | -0.03             | -0.05                 | -0.10                 | -0.14             |
| 5.5             | 0.08                  | 0.01                  | -0.02             | -0.03                 | -0.08                 | -0.11             |
| 5.6             | 0.08                  | 0.02                  | -0.02             | -0.02                 | -0.06                 | -0.09             |
| 5.7             | 0.08                  | 0.01                  | -0.03             | 0.00                  | -0.04                 | -0.08             |
| 5.8             | 0.08                  | 0.04                  | 0.03              | 0.02                  | -0.03                 | -0.06             |
| 5.9             | 0.08                  | 0.04                  | 0.03              | 0.03                  | -0.02                 | -0.05             |
| 6.0             | 0.08                  | 0.05                  | 0.03              | 0.04                  | -0.01                 | -0.04             |
| 7.0             | 0.07                  | 0.07                  | 0.08              | 0.10                  | 0.05                  | 0.02              |
| 8.0             | 0.05                  | 0.03                  | 0.02              | 0.09                  | 0.06                  | 0.04              |

**Table S6.** The table shows the Potential Energy values (in kcal/mol) for both the lp- $\pi$  and OH- $\pi$  geometries of the water-cytosine interactions. Further details are given in the legend of Table S3.

| Distance<br>(Å) | lp- $\pi$             |                       |                   | OH- $\pi$             |                       |                   |
|-----------------|-----------------------|-----------------------|-------------------|-----------------------|-----------------------|-------------------|
|                 | cc-pvTZ<br>(kcal/mol) | cc-pvQZ<br>(kcal/mol) | CBS<br>(kcal/mol) | cc-pvTZ<br>(kcal/mol) | cc-pvQZ<br>(kcal/mol) | CBS<br>(kcal/mol) |
| 2.4             | 4.38                  | 3.32                  | 2.60              | 19.60                 | 18.51                 | 17.71             |
| 2.5             | 2.35                  | 1.47                  | 0.86              | 13.64                 | 12.69                 | 11.99             |
| 2.6             | 0.94                  | 0.22                  | -0.28             | 9.27                  | 8.43                  | 7.81              |
| 2.7             | 0.08                  | -0.59                 | -1.04             | 6.09                  | 5.33                  | 4.79              |
| 2.8             | -0.44                 | -1.02                 | -1.41             | 3.80                  | 3.12                  | 2.64              |
| 2.9             | -0.73                 | -1.26                 | -1.62             | 2.19                  | 1.60                  | 1.19              |
| 3.0             | -0.88                 | -1.34                 | -1.64             | 1.02                  | 0.51                  | 0.17              |
| 3.1             | -0.92                 | -1.30                 | -1.55             | 0.29                  | -0.20                 | -0.53             |
| 3.2             | -0.88                 | -1.23                 | -1.45             | -0.23                 | -0.62                 | -0.87             |
| 3.3             | -0.83                 | -1.13                 | -1.33             | -0.51                 | -0.86                 | -1.09             |
| 3.4             | -0.74                 | -1.01                 | -1.18             | -0.67                 | -0.98                 | -1.19             |
| 3.5             | -0.65                 | -0.89                 | -1.03             | -0.71                 | -0.98                 | -1.15             |
| 3.6             | -0.56                 | -0.77                 | -0.89             | -0.73                 | -0.92                 | -1.05             |
| 3.7             | -0.49                 | -0.67                 | -0.77             | -0.71                 | -0.86                 | -0.97             |
| 3.8             | -0.42                 | -0.58                 | -0.67             | -0.66                 | -0.79                 | -0.89             |
| 3.9             | -0.35                 | -0.49                 | -0.57             | -0.60                 | -0.72                 | -0.79             |
| 4.0             | -0.30                 | -0.42                 | -0.49             | -0.53                 | -0.62                 | -0.68             |
| 4.1             | -0.25                 | -0.35                 | -0.41             | -0.46                 | -0.55                 | -0.61             |
| 4.2             | -0.21                 | -0.29                 | -0.34             | -0.40                 | -0.47                 | -0.51             |
| 4.3             | -0.17                 | -0.24                 | -0.29             | -0.35                 | -0.40                 | -0.43             |
| 4.4             | -0.13                 | -0.20                 | -0.24             | -0.30                 | -0.34                 | -0.37             |
| 4.5             | -0.10                 | -0.16                 | -0.20             | -0.26                 | -0.29                 | -0.31             |
| 4.6             | -0.08                 | -0.13                 | -0.16             | -0.21                 | -0.24                 | -0.26             |
| 4.7             | -0.06                 | -0.11                 | -0.13             | -0.17                 | -0.20                 | -0.21             |
| 4.8             | -0.04                 | -0.08                 | -0.10             | -0.14                 | -0.16                 | -0.17             |
| 4.9             | -0.02                 | -0.06                 | -0.08             | -0.11                 | -0.13                 | -0.14             |
| 5.0             | -0.01                 | -0.05                 | -0.07             | -0.08                 | -0.09                 | -0.10             |
| 5.1             | 0.00                  | -0.03                 | -0.05             | -0.06                 | -0.07                 | -0.08             |
| 5.2             | 0.01                  | -0.02                 | -0.04             | -0.04                 | -0.05                 | -0.05             |
| 5.3             | 0.01                  | -0.01                 | -0.03             | -0.02                 | -0.02                 | -0.03             |
| 5.4             | 0.02                  | 0.00                  | -0.01             | 0.00                  | -0.01                 | -0.01             |
| 5.5             | 0.02                  | 0.00                  | -0.01             | 0.02                  | 0.01                  | 0.00              |
| 5.6             | 0.03                  | 0.01                  | 0.00              | 0.03                  | 0.02                  | 0.01              |
| 5.7             | 0.03                  | 0.01                  | 0.01              | 0.04                  | 0.03                  | 0.03              |
| 5.8             | 0.03                  | 0.01                  | 0.01              | 0.05                  | 0.04                  | 0.04              |
| 5.9             | 0.03                  | 0.02                  | 0.01              | 0.06                  | 0.05                  | 0.05              |
| 6.0             | 0.04                  | 0.02                  | 0.01              | 0.06                  | 0.06                  | 0.05              |
| 7.0             | 0.03                  | 0.03                  | 0.02              | 0.09                  | 0.09                  | 0.08              |
| 8.0             | 0.02                  | 0.02                  | 0.02              | 0.09                  | 0.08                  | 0.08              |

**Table S7.** The table shows the Potential Energy values (in kcal/mol) for both the lp- $\pi$  and OH- $\pi$  geometries of the water-N3(+)cytosine interactions. Further details are given in the legend of Table S3.

| Distance<br>(Å) | lp- $\pi$             |                       |                   | OH- $\pi$             |                       |                   |
|-----------------|-----------------------|-----------------------|-------------------|-----------------------|-----------------------|-------------------|
|                 | cc-pvTZ<br>(kcal/mol) | cc-pvQZ<br>(kcal/mol) | CBS<br>(kcal/mol) | cc-pvTZ<br>(kcal/mol) | cc-pvQZ<br>(kcal/mol) | CBS<br>(kcal/mol) |
| 2.4             | -4.08                 | -4.75                 | -5.32             | 23.69                 | 22.72                 | 21.99             |
| 2.5             | -5.90                 | -6.45                 | -6.93             | 17.69                 | 16.85                 | 16.23             |
| 2.6             | -7.06                 | -7.48                 | -7.88             | 13.15                 | 12.40                 | 11.85             |
| 2.7             | -7.79                 | -8.08                 | -8.39             | 9.86                  | 9.25                  | 8.80              |
| 2.8             | -8.12                 | -8.35                 | -8.61             | 7.52                  | 6.96                  | 6.55              |
| 2.9             | -8.19                 | -8.40                 | -8.63             | 5.84                  | 5.34                  | 4.99              |
| 3.0             | -8.12                 | -8.29                 | -8.50             | 4.57                  | 4.17                  | 3.90              |
| 3.1             | -7.93                 | -8.05                 | -8.21             | 3.75                  | 3.33                  | 3.05              |
| 3.2             | -7.67                 | -7.78                 | -7.92             | 3.17                  | 2.85                  | 2.63              |
| 3.3             | -7.39                 | -7.48                 | -7.61             | 2.83                  | 2.54                  | 2.34              |
| 3.4             | -7.09                 | -7.15                 | -7.25             | 2.62                  | 2.40                  | 2.26              |
| 3.5             | -6.80                 | -6.84                 | -6.92             | 2.51                  | 2.26                  | 2.09              |
| 3.6             | -6.50                 | -6.56                 | -6.63             | 2.42                  | 2.26                  | 2.16              |
| 3.7             | -6.22                 | -6.27                 | -6.33             | 2.39                  | 2.24                  | 2.15              |
| 3.8             | -5.96                 | -6.00                 | -6.05             | 2.35                  | 2.24                  | 2.17              |
| 3.9             | -5.71                 | -5.75                 | -5.79             | 2.36                  | 2.24                  | 2.16              |
| 4.0             | -5.47                 | -5.52                 | -5.57             | 2.36                  | 2.25                  | 2.17              |
| 4.1             | -5.24                 | -5.28                 | -5.32             | 2.37                  | 2.27                  | 2.21              |
| 4.2             | -5.03                 | -5.07                 | -5.11             | 2.37                  | 2.29                  | 2.23              |
| 4.3             | -4.83                 | -4.88                 | -4.91             | 2.36                  | 2.28                  | 2.24              |
| 4.4             | -4.64                 | -4.69                 | -4.72             | 2.35                  | 2.27                  | 2.22              |
| 4.5             | -4.47                 | -4.51                 | -4.54             | 2.33                  | 2.27                  | 2.23              |
| 4.6             | -4.31                 | -4.34                 | -4.36             | 2.31                  | 2.25                  | 2.21              |
| 4.7             | -4.16                 | -4.19                 | -4.22             | 2.28                  | 2.23                  | 2.20              |
| 4.8             | -4.02                 | -4.05                 | -4.07             | 2.26                  | 2.20                  | 2.17              |
| 4.9             | -3.89                 | -3.91                 | -3.93             | 2.22                  | 2.18                  | 2.15              |
| 5.0             | -3.76                 | -3.78                 | -3.80             | 2.19                  | 2.14                  | 2.12              |
| 5.1             | -3.64                 | -3.66                 | -3.67             | 2.15                  | 2.12                  | 2.11              |
| 5.2             | -3.53                 | -3.54                 | -3.55             | 2.12                  | 2.08                  | 2.06              |
| 5.3             | -3.42                 | -3.43                 | -3.44             | 2.08                  | 2.05                  | 2.04              |
| 5.4             | -3.32                 | -3.33                 | -3.34             | 2.05                  | 2.02                  | 2.00              |
| 5.5             | -3.22                 | -3.23                 | -3.24             | 2.01                  | 1.97                  | 1.96              |
| 5.6             | -3.13                 | -3.14                 | -3.15             | 1.97                  | 1.95                  | 1.93              |
| 5.7             | -3.05                 | -3.05                 | -3.05             | 1.92                  | 1.90                  | 1.89              |
| 5.8             | -2.96                 | -2.96                 | -2.97             | 1.88                  | 1.87                  | 1.86              |
| 5.9             | -2.88                 | -2.88                 | -2.88             | 1.85                  | 1.83                  | 1.82              |
| 6.0             | -2.80                 | -2.80                 | -2.80             | 1.81                  | 1.79                  | 1.78              |
| 7.0             | -2.18                 | -2.17                 | -2.16             | 1.46                  | 1.44                  | 1.44              |
| 8.0             | -1.74                 | -1.73                 | -1.73             | 1.18                  | 1.17                  | 1.17              |
